1                   **Title: Molecular basis of mitotic decline during human aging**

2

3   **Authors:** Joana Catarina Macedo<sup>1,2</sup>, Sara Vaz<sup>1,2</sup>, Bjorn Bakker<sup>4</sup>, Rui Ribeiro<sup>1,2</sup>, Petra Bakker<sup>4</sup>,  
4   Jose Miguel Escandell<sup>5</sup>, Miguel Godinho Ferreira<sup>5</sup>, René Medema<sup>6</sup>, Floris Foijer<sup>4</sup> and Elsa  
5   Logarinho<sup>1,2,3\*</sup>

6   **Affiliations:**

7   <sup>1</sup> Aging and Aneuploidy Laboratory, IBMC, Instituto de Biologia Molecular e Celular,  
8   Universidade do Porto, 4200-135 Porto, Portugal.

9   <sup>2</sup> i3S, Instituto de Investigação e Inovação em Saúde, Universidade do Porto, 4200-135 Porto,  
10   Portugal.

11   <sup>3</sup> Cell Division Unit, Department of Experimental Biology, Faculty of Medicine, Universidade do  
12   Porto, 4200-319 Porto, Portugal.

13   <sup>4</sup> European Research Institute for the Biology of Aging, University of Groningen, University  
14   Medical Center Groningen, NL-9713 AV Groningen, The Netherlands.

15   <sup>5</sup> Instituto Gulbenkian de Ciência, Oeiras, Portugal.

16   <sup>6</sup> Division of Cell Biology I, The Netherlands Cancer Institute, The Netherlands.

17   \*Corresponding author/lead contact: email: [elsa.logarinho@ibmc.up.pt](mailto:elsa.logarinho@ibmc.up.pt); phone: +351 220

18   408 800.

19

20 **Abstract:** Aneuploidy, an abnormal chromosome number, has been linked to aging and age-  
21 associated diseases, but the underlying molecular mechanisms remain unknown. Supported by  
22 direct live-cell imaging of young, middle-aged and old-aged primary human dermal fibroblasts,  
23 we found that aneuploidy increases with aging due to general dysfunction of the mitotic  
24 machinery. Increased chromosome segregation defects in elderly mitotic cells correlated with an  
25 early senescence-associated secretory phenotype (SASP) and repression of Forkhead box M1  
26 (FoxM1), the transcription factor that drives expression of most G2/M genes. By restoring  
27 FoxM1 levels in elderly and Hutchison-Gilford Progeria Syndrome fibroblasts we prevented  
28 aneuploidy and, importantly, ameliorated cellular phenotypes associated with aging. Moreover,  
29 senescent fibroblasts isolated from elderly donors' cultures were mostly aneuploid, suggesting  
30 that aneuploidy is a key player in the progression into full senescence phenotypes. Based on this  
31 feedback loop between cellular aging and aneuploidy, we propose modulation of mitotic  
32 efficiency through FoxM1 as a potential strategy against aging and progeria syndromes.

33

34 Aging has been linked to an increase in aneuploidy for the past several decades <sup>1</sup>. This  
35 association has been well documented for oocytes and is considered to be the main cause of  
36 miscarriage and birth defects in humans <sup>2</sup>. However, aneuploidy can also arise in somatic cells,  
37 and a number of studies have reported age-dependent increases in aneuploidy <sup>3-7</sup>. These studies  
38 have shown that aging is positively correlated with the incidence of chromosome mis-  
39 segregation, raising the question whether there is a general dysfunction of the mitotic apparatus  
40 in aged cells <sup>8</sup>. Transcriptome analyses of a panel of fibroblast and lymphocyte cultures from  
41 young and old individuals revealed changes in the expression of genes controlling the mitotic  
42 machinery <sup>9,10</sup>. However, the use of mixed cell populations in different stages of the cell cycle

43 and the lower mitotic indexes of elderly cell cultures has limited these studies from clearly  
44 demonstrating whether mitotic genes are repressed intrinsically in old dividing cells. Moreover,  
45 analysis of the mitotic process in aging models and diseases has been scarce and a  
46 comprehensive analysis of cell division efficiency in naturally aged cells is largely missing.

47 More recently, aneuploidy has been also linked to aging. Studies of aneuploidy-prone mouse  
48 models exhibiting increased rates of chromosome mis-segregation uncovered a unanticipated  
49 nexus with the rate of aging and the development of age-related pathologies<sup>11-14</sup>. Mutant mice  
50 with low levels of the spindle assembly checkpoint protein BubR1 were found to develop  
51 progressive aneuploidy along with a variety of progeroid features, including short lifespan,  
52 growth retardation, sarcopenia, cataracts, loss of subcutaneous fat and impaired wound healing  
53<sup>11</sup>. In addition, systematic analyses of disomic yeast, trisomic mouse and human cells, all cells  
54 with an extra chromosome, have elucidated the impact of aneuploidy in cellular fitness<sup>15</sup>. The  
55 cumulative effect of copy number changes of many genes induces the so called pan-aneuploidy  
56 phenotypes<sup>16</sup>, namely proliferation defects<sup>17,18</sup>, gene signature of environmental stress response  
57<sup>19,20</sup>, multiple forms of genomic instability<sup>21-23</sup>, and proteotoxicity<sup>24-26</sup>, which interestingly, are  
58 cellular hallmarks of aging<sup>27</sup>.

59 Together, these observations suggest that there is a positive correlation between aging and  
60 aneuploidy but evidence for mitotic decline in elderly dividing cells and for aneuploidy-driven  
61 permanent loss of proliferation capacity (full senescence) is limited. Here, we used live cell time-  
62 lapse imaging to investigate the mitotic behavior of human dermal fibroblasts collected from  
63 healthy Caucasian males with ages ranging from neonatal to octogenarian and cultured under  
64 low passage number. We show mitotic duration to increase with advancing age alongside with a  
65 higher rate of mitotic defects. We demonstrate this mitotic decline to arise from a transcriptional

66 shutdown of mitotic genes in pre-senescent dividing cells exhibiting senescence-associated  
67 secretory phenotype (SASP). We show short-term induction of FoxM1 transcriptional activity to  
68 improve mitotic fitness and ameliorate senescence phenotypes in elderly and progeroid cells.  
69 Finally, we identify aneuploidy as a major hallmark of full senescence in naturally aged cells  
70 thus pointing up for the potential of mitotic fitness enhancement as an anti-aging strategy.

71

## 72 **Results**

### 73 *Aneuploidy increases during natural aging*

74 In our study we used human dermal fibroblasts (HDFs) collected from healthy Caucasian males  
75 with ages ranging from neonatal to octogenarian (Supplementary Fig.1a), to test whether  
76 aneuploidy increases during natural aging and if this is a consequence of a general dysfunction of  
77 the mitotic machinery in aged cells. Since inter-individual differences exist in the rate at which a  
78 person ages (biological age), we included two donors of each age in a total of five chronological  
79 ages to increase the robustness of any correlation found with chronological aging. In addition, we  
80 used dermal fibroblasts from an 8 years-old child with the Hutchison-Gilford progeria syndrome  
81 (HGPS) as a model of premature cellular aging<sup>28</sup>. Considering that during a normal post-natal  
82 lifespan cells *in vivo* will hardly reach the exhaustion number of replications observed in culture  
83<sup>29</sup>, and to limit any artifacts and clonal selection of *in vitro* culturing, only early cell culture  
84 passages way below replicative lifespan exhaustion were used (Population doubling level  
85 (PDL)<24). Chronic accumulation of macromolecular damage during natural aging induces a  
86 cellular stress response known as senescence<sup>30</sup>, and accumulation of senescent cells has been  
87 widely used to reflect biological age and linked to pathological aging<sup>31,32</sup>. Accordingly, we  
88 found significantly higher levels of senescence-associated (SA) biomarkers<sup>33</sup>, measured under

89 strict quantitative parameters by microscopy analysis, in the proliferating fibroblast cultures from  
90 older individuals and the HGPS patient (Supplementary Fig.1b-g), thus validating their  
91 suitability as models of advanced and premature aging, respectively.

92 To determine if aneuploidy increases with aging, we performed fluorescence *in situ*  
93 hybridization (FISH) analysis for three chromosome pairs. We found significantly higher  
94 aneusomy indexes in asynchronous cell populations of middle-aged, old-aged and progeria  
95 samples (Fig. 1a,b). However, because aneuploid cells are most likely outcompeted in culture by  
96 diploid cells<sup>17</sup>, thereby diluting the aneuploidy index, we additionally measured aneuploidy in a  
97 post-mitotic cell subpopulation generated during a 24h treatment with the cytokinesis inhibitor  
98 cytochalasin D (Fig. 1a,c). Using this approach, we observed even higher aneuploidy in the  
99 middle-aged, old-aged and progeria cultures. Thus, the mild aneuploidy levels found in elder  
100 cultures support the idea of an age-associated loss of mitotic fidelity.

#### 101 *Elder cells divide slower with increased rate of mitotic defects*

102 To gain insight into how old cells divide, we followed individual mitotic cells by long-term  
103 phase-contrast time-lapse imaging. Interestingly, we found the interval between nuclear envelope  
104 breakdown (NEB) and anaphase onset to increase steadily with advancing age (Fig. 1d-e). To  
105 exclude any effects due to genetic heterogeneity between the Caucasian donors and to  
106 discrepancies in culture population doubling levels, we used mouse adult fibroblasts recurrently  
107 sampled from female mice over a period of 2 years. In this model, culture conditions were highly  
108 controlled, thereby providing a solid “ex vivo” model of chronological aging. Again, both  
109 mitotic duration (Supplementary Fig.2a-c) and senescence-associated biomarkers  
110 (Supplementary Fig.2d-e) progressively increased with aging.

111 We then asked what could be leading to the age-associated mitotic delay. Bypass of short

112 telomere-triggered senescence by disruption of tumor-suppressive pathways, shown to elicit  
113 telomere fusion-driven prolonged mitosis <sup>34</sup>, was ruled out as potential cause since we found no  
114 evidence for chromosome fusions in metaphase spreads of the primary dermal fibroblasts used in  
115 our study (Supplementary Fig.3a). Activation of the spindle assembly checkpoint (SAC) by  
116 defective kinetochore-microtubule attachments and/or reduced efficiency of the ubiquitin-  
117 proteasome system induced by proteotoxic stress could alternatively explain the delay between  
118 NEB and anaphase onset in older cells. We found the mitotic delay to depend on SAC activity as  
119 treatment with a small molecule inhibitor of the Mps1 kinase rescued mitotic duration to similar  
120 levels in all cell cultures (Fig. 1d,f). Enhancement of proteasome activity with a small molecule  
121 inhibitor of the Usp14 deubiquitinase did not change mitotic duration considerably  
122 (Supplementary Fig.3b). As a correlation between cell size, mitotic duration and SAC strength  
123 was recently described <sup>35</sup>, we further tested whether aging-associated mitotic delay was due to  
124 increased cell size. We found no significant correlation between mitotic duration and cell size in  
125 fibroblast cultures (Supplementary Fig.3c-f). In addition, when treated with the kinesin-5  
126 inhibitor (STLC) to induce chronic activation of the SAC, elderly cells arrested in mitosis as long  
127 as young cells before they slipped out, suggesting SAC strength is similar (Supplementary  
128 Fig.3g).

129 To investigate chromosome and/or spindle defects contributing to increased mitotic duration in  
130 older cells, we performed high-resolution spinning-disk confocal microscopy in cells expressing  
131 H2B-GFP and  $\alpha$ -Tubulin-mCherry. We found several mitotic defects to be significantly  
132 increased in middle-aged and old-aged samples (Fig. 2a-d), namely chromosome congression  
133 delay (Fig. 2b), anaphase lagging chromosomes (Fig. 2c) and spindle mispositioning in relation  
134 to the growth surface (Fig. 2d). These phenotypes were quantified by scoring the percentage of

135 cells exhibiting severe vs. mild chromosome mis-segregation following treatment with the Mps1  
136 inhibitor (Fig. 2e; Supplementary Fig.4a); micronuclei <sup>36</sup> (Fig. 2f); spindle mispositioning (Fig.  
137 2g, Supplementary Fig.4b-d); and cytokinesis failure (Fig. 2h). Overall, the data indicated that  
138 alongside increased aneuploidy, aging triggers abnormalities at several mitotic stages.

### 139 *Elderly mitotic fibroblasts exhibit SASP and transcriptional shutdown of mitotic genes*

140 To identify the molecular mechanisms behind this complex aging-associated mitotic phenotype,  
141 we performed RNA sequencing (RNA-seq) gene expression profiling of cells captured in mitosis  
142 accordingly to the experimental layout shown in Fig. 3a. This procedure yielded purified cell  
143 populations with mitotic indices >95% in both neonatal and 87y donor cultures (Fig. 3b). RNA-  
144 seq revealed that the abundance of 3,319 gene transcripts was significantly altered in  
145 octogenarian mitotic fibroblasts compared to neonatal mitotic fibroblasts (Fig. 3c). Principal  
146 component analysis (PCA) showed that the biological replicates were consistent (Fig. 3d). In  
147 agreement with the elderly cell defects in mitosis, the top 10 most altered Gene Ontology (GO)  
148 terms included 7 cell cycle- and mitosis-related gene ontologies (Fig. 3e). 105 ‘mitotic cell cycle’  
149 genes were significantly altered in octogenarian mitotic fibroblasts ( $p$ -value<0.05;  
150 Supplementary Table 1), representing a 1.7-fold enrichment of alterations in this gene set ( $p$ -  
151 value=8.4E-9) (Fig. 3g). Moreover, we found significantly altered expression of 16 out of 29  
152 cytokines, metalloproteinases (MMPs) and other factors previously associated with the  
153 senescence-associated secretory phenotype (SASP) <sup>37</sup>, in the elderly vs. neonatal mitotic cells  
154 (Fig. 3f). Thus, an unforeseen SASP phenotype evolves in elderly dividing cells, alongside a  
155 global transcriptional shutdown of mitotic genes, likely accounting for aging-associated mild  
156 aneuploidy levels.

### 157 *FoxM1 repression dictates mitotic decline during natural aging*

158 RNA-seq analysis also disclosed Forkhead box M1 (FOXM1), the transcription factor that  
159 primarily drives the expression of G2/M cell cycle genes, to be downregulated in elderly mitotic  
160 cells (logFC:-0.85; FDR<5%; Supplementary Table 1). Indeed, 66 out of the 105 ‘mitotic cell  
161 cycle’ genes altered in the octogenarian fibroblasts have been reported as targets of the Myb-  
162 MuvB (MMB)-FOXM1 transcription complex containing the cell cycle genes homology region  
163 (CHR) motif in their promoters<sup>38,39</sup> (Supplementary Fig.6a). In addition, loss of FOXM1 has  
164 previously been shown to cause pleiotropic cell-cycle defects leading to embryonic lethality<sup>40</sup>.  
165 We therefore asked whether loss of mitotic proficiency during normative aging was due to  
166 FOXM1 downregulation. Indeed, increasing age correlated with decreased FoxM1 transcript and  
167 protein levels in our human (Fig. 4a-c) and mouse (Supplementary Fig.2f) samples. Importantly,  
168 unlike previous studies linking FoxM1 repression and aging<sup>41,42</sup>, by analyzing the  
169 transcriptomes of mitotic cells only, we uncoupled FoxM1 downregulation from the subsequent  
170 reduction in cell proliferation, demonstrating that elderly cells divide with intrinsically low levels  
171 of FoxM1. We thus conclude that aging-associated FoxM1 repression likely accounts for the  
172 transcriptional shutdown of mitotic genes and the observed phenotypes in pre-senescent dividing  
173 cells.

174 To test the correlation between FoxM1 repression and age-associated phenotypes further, we  
175 RNAi-depleted FoxM1 in fibroblasts from the 10 years-old donor (Supplementary Fig.5a,b) and  
176 performed RNA sequencing (RNA-seq) gene expression profiling of cells captured in mitosis.  
177 RNA-seq revealed that FoxM1 repression significantly altered the abundance of 4,451 gene  
178 transcripts (Supplementary Fig.6b,c; Supplementary Table 1), which were enriched for ‘mitotic  
179 cell cycle’ genes (206 genes, Gene Ontology [GO] analysis; 5% FDR) (Fig. 4d). This constituted  
180 a 2.52-fold enrichment of alterations in this gene set ( $p$ -value=1.09E-42). The top ten most



181 altered GO terms included five related to mitosis (Supplementary Fig.6e), and 217 out of 249  
182 G2/M cell cycle genes previously reported as targets of the DREAM (DP, RB-like, E2F4 and  
183 MuvB) and MMB-FOXM1 transcriptional complexes<sup>43</sup>, were downregulated following FoxM1  
184 depletion (Supplementary Fig.6e). In agreement with these transcriptional alterations, FoxM1-  
185 depleted young fibroblasts displayed a mitotic delay (Fig. 4e), mitotic defects (Supplementary  
186 Fig.5c-e) and increased aneuploidy (Fig. 4f,g) similarly to old-aged fibroblasts. Interestingly, the  
187 percentage of cells with SA biomarkers (Fig. 4h,i), as well as the expression of SASP genes itself  
188 (Fig. 4j) also increased following FoxM1 repression. Altogether, these results show that young  
189 cells with low levels of FoxM1 recapitulate the aging-associated mitotic defects, aneuploidy and  
190 senescence.

191 *Constitutively active FoxM1 rescues mitotic decline and cellular senescence in elderly and*  
192 *HGPS cells*

193 As FoxM1 depletion reduced mitotic fidelity and induced senescence in young cells, we  
194 hypothesized that FoxM1 overexpression in elderly cells should counteract aging phenotypes.  
195 Expression of a constitutively active truncated form of FoxM1 (FoxM1-dNdK) in old-aged  
196 fibroblasts<sup>44,45</sup> (Supplementary Fig.5f,g) resulted in altered expression of 1,955 gene transcripts  
197 as determined by RNA-seq (Supplementary Fig.6b,d; Supplementary Table 1), including 85  
198 ‘mitotic cell cycle’ genes (Fig. 5a). Moreover, 149 out of the 249 DREAM/MMB-FOXM1 gene  
199 targets were significantly upregulated following FoxM1-dNdK expression (Supplementary  
200 Fig.6e). In addition, we found extensive overlap between genes of mitosis-related GO terms that  
201 were downregulated in FoxM1 RNAi and upregulated in FoxM1-dNdK expression experiments  
202 (1,163 genes; Supplementary Fig.6e; Supplementary Table 2). Concordantly, the age-associated  
203 mitotic defects were ameliorated in elderly fibroblasts expressing FoxM1-dNdK (Fig. 5b,c;

204 Supplementary Fig.5h-j), resulting in decreased aneuploidy levels (Fig. 5d,e). Furthermore, the  
205 percentage of cells with SA biomarkers (Fig. 5f,g) and the transcript levels of SASP genes (Fig.  
206 5h) were decreased. Importantly, FoxM1-dNdK expression also partly rescued the mitotic  
207 defects, aneuploidy levels and percentage of senescent cells in HGPS fibroblasts (Fig. 5i-p).  
208 Overall, these data demonstrate that modulation of mitotic efficiency through FoxM1 induction  
209 in elderly and HGPS cells prevents both aneuploidy and cellular senescence.

### 210 *Aneuploidy is a hallmark of elderly senescent cells*

211 Experimental modulation of FoxM1 levels in the young (FoxM1 RNAi) and elderly fibroblasts  
212 (FoxM1-dNdK) underlined aneuploidy and senescence to be inherently linked. Previous studies  
213 have found mouse models of chromosomal instability to exhibit premature aging<sup>11,46</sup>, and  
214 cellular models of CIN to induce senescence<sup>47</sup>. Though informative, these studies suffer the  
215 drawbacks that CIN-inducing single gene editing leads to higher aneuploidy levels than those  
216 accumulating during normal aging, and is a non-physiological stress either present from early  
217 development onward (mouse models) or acutely induced (cellular models). Whether the mild  
218 aneuploidy levels associated with global transcriptional shutdown of mitotic genes account for  
219 cellular senescence in natural aging remains unknown. To address this question, we FACS-sorted  
220 senescent cells from neonatal or elderly fibroblast cultures using SA- $\beta$ -gal as a senescence  
221 marker and measured the aneusomy index of three chromosome pairs (Fig. 6a-f). As expected,  
222 the percentage of SA- $\beta$ -gal positive cells was considerably higher in elderly vs. neonatal early  
223 passage cell cultures (Fig. 6a,b,e), and consistent with our quantitative analysis using  
224 fluorescence microscopy (Supplementary Fig.1d). The aneusomy indexes of SA- $\beta$ -gal positive  
225 cells were significantly higher than those of unsorted controls (Fig. 6f). Extrapolation of the  
226 aneusomy indexes to 23 chromosome pairs indicated aneuploidy levels of ~25% and ~70% in

227 neonatal and elderly cell subpopulations, respectively. Thus, our data indicate that senescent  
228 cells from old donors are significantly more aneuploid than senescent cells from young donors,  
229 suggesting aneuploidy as a major hallmark of cellular senescence in natural aging. To investigate  
230 whether FoxM1 repression is responsible for this difference, we next FACS-sorted SA- $\beta$ -gal  
231 positive cells from siFoxM1-depleted neonatal cell cultures and from octogenarian cell cultures  
232 expressing FoxM1-dNdK (Fig. 6c-e). We observed a 4.9x increase of senescent cells, and a  
233 comparable 5.3x increase in the aneusomy index, following FoxM1 repression in cells from  
234 neonatal donors. Conversely, a 2.2x decrease of senescent cells, and a 1.5x decrease in the  
235 aneusomy index was found following FoxM1-dNdK expression. These results demonstrate that  
236 FoxM1 levels modulate aneuploidy-driven senescence.

237 Altogether, our data point up for a positive feedback loop between cellular aging and aneuploidy,  
238 in which naturally aged cells with early senescent phenotypes loose mitotic fidelity and generate  
239 an aneuploid progeny that primarily accounts for the accumulation of full senescent phenotypes.  
240 We show that induction of FoxM1 transcriptional activity in elderly cells ameliorates cell  
241 autonomous and non-autonomous feedback effects between mitotic fidelity and senescence (Fig.  
242 6g).

243

## 244 **Discussion**

245 Aging is the largest risk factor for most diseases <sup>48</sup>. In recent years, seminal studies have shown  
246 that the accumulation of senescent cells in tissues over time shortens healthy lifespan and that  
247 selective clearance of senescent cells can greatly postpone aging <sup>32,49</sup>. Our results bring novel  
248 insight into how senescent cells arise and provide a molecular basis to prevent senescence and  
249 thus, an alternative strategy to emergent senolytic therapies <sup>50</sup>.

250 *SASP phenotype in elderly mitotic cells and aneuploidy-driven senescence.* Previous studies have  
251 suggested G2 and 4N G1 (mitosis skip) as the phase at which senescent cells exit the cell cycle  
252 <sup>51,52</sup>. However, these studies made use of the acute senescence stimuli, gamma irradiation and  
253 oncogenic Ras overexpression respectively. In contrast to acute senescence, chronic senescence  
254 results from long-term, gradual macromolecular damage caused by stresses during lifespan (e.g.  
255 loss of proteostasis, DNA damage, epigenetic changes). We demonstrate that in a natural aging  
256 cellular model, consisting of dermal fibroblasts retrieved from elderly donors and cultured under  
257 limited passage number to prevent replicative *in vitro* aging, senescent cells are mostly aneuploid  
258 as a result of defective chromosome mis-segregation. Nonetheless, as shown for oncogene-  
259 induced senescence and replicative senescence <sup>52,53</sup>, one round of cell division is likely required  
260 for a transition from ‘early’ to fully senescent state. Consistent with this idea of senescent state  
261 evolution, we found elderly mitotic cells to express SASP genes. The SASP is largely initiated  
262 by p38 MAPK signaling <sup>54</sup>, which has been shown to be activated by mitotic delay <sup>55,56</sup>, which  
263 fits with our observation that mitotic duration steadily increases with aging.

264 Even though aneuploidy has been correlated with senescence, previous studies have used  
265 genetically induced chromosomal instability models or *in vitro* models of acute senescence  
266 induction in which the aneuploidy levels are too high in comparison to the mild levels we found  
267 in our model of naturally aged cells. Nevertheless, using an innovative experimental setup, we  
268 demonstrated that FACS-sorted cells exhibiting high SA- $\beta$ -gal activity are prominently  
269 aneuploid in old samples compared to young samples. We hypothesize this difference to be the  
270 result of an aneuploidization propensity of elderly cells, caused by the repression of players of  
271 the error-correction machinery for chromosome attachments (Supplementary Table 1).

272 *Molecular mechanism of aging mitotic decline.* We showed that the frequency of mitotic

273 abnormalities increases in older cells resulting in mild aneuploidy levels. We identified FoxM1  
274 transcription factor as the molecular determinant of this age-associated mitotic decline. FoxM1  
275 repression is likely mediated by activation of stress pathways, presumably triggered by primary  
276 causes of cellular damage, such as genomic instability or loss of proteostasis. For instance, it has  
277 been shown that genotoxic stress can activate the p53-p21-DREAM pathway, which in turn  
278 prevents early cell cycle gene expression required for FoxM1 transcriptional activity<sup>43,57</sup>.  
279 Transcriptional deregulation during aging has been widely reported in asynchronous cell  
280 populations<sup>58,59</sup>. In this study, we used synchronized mitotic populations and found that many  
281 cell cycle genes were deregulated in old cells when compared to young cells. Intriguingly, old  
282 mitotic cells have intrinsic low levels of mitotic transcripts. While this supports the observed  
283 mitotic abnormalities and increased aneuploidy, it is still surprising how elderly mitotic cells can  
284 cope with such reduced levels of transcripts (e.g. *CCNBI*). One possibility might be the  
285 balanced/stoichiometric repression of most mitotic genes. Furthermore, parallel mechanisms  
286 might buffer aging-mediated repression of mitotic transcripts. For example, even though we  
287 found SAC genes to be downregulated in elderly cells, SAC functionality was similar in young  
288 and old cells, suggesting that a parallel downregulation of genes contributing to proteasome  
289 activity (e.g. APC/C subunits) might buffer SAC gene repression (Supplementary Table 1).

290 *Modulation of FoxM1 activity to ameliorate cellular aging phenotypes.* We demonstrate that  
291 reestablishment of FoxM1 expression in elderly and HGPS fibroblasts can rescue mitotic decline  
292 and aneuploidy-driven senescence. Fibroblasts are the main constituents of connective tissue and  
293 are important players in extracellular matrix production and tissue repair. Therefore, preventing  
294 the accumulation of senescent fibroblasts will counteract a SASP-induced inflammatory  
295 microenvironment in these tissues, and will help to protect stem cell and parenchymal cell

296 functions. Re-expression of FoxM1 could thus protect against adult stem cell and post-mitotic  
297 tissue aging. Indeed, increased expression of one FoxM1 transcriptional target, BubR1<sup>43</sup>, was  
298 previously shown to prevent aneuploidization and delay aging<sup>13</sup>. However, other aneuploidy  
299 mouse models have not been reported to exhibit premature aging. Possible explanations are the  
300 premature sacrifice of mice before they start developing aging phenotypes later in life and the  
301 cursory analysis for overt age-related degeneration missing tissue-specific phenotypes<sup>14</sup>.  
302 Alternatively, aneuploidy-associated genes that are strongly linked with early aging might  
303 require induction of mild levels of aneuploidy or counteracting functions in additional cellular  
304 stresses that engage senescence response pathways. This appears to be the case of FoxM1. Not  
305 only FoxM1 repression translates into mild aneuploidy levels, but also FoxM1 might further act  
306 by counteracting age-associated cellular damage caused by genotoxic and oxidative stresses<sup>42,60</sup>.  
307 Interestingly, increased FoxM1 expression was shown to improve liver-regenerating capacity in  
308 older mice<sup>41</sup> and lung regeneration following injury<sup>61</sup> without being tumorigenic, reinforcing  
309 that transcriptional modulation of mitotic fidelity could become a powerful therapy against aging  
310 and progeria syndromes, with advantages over other emergent strategies<sup>50,62</sup>. Not only it would  
311 circumvent the risks associated with cellular reprogramming to pluripotency, but it would also  
312 prevent senescent cell accumulation and thus avoid any irreversible deterioration of tissue  
313 extracellular matrix, which can not be rescued by senolysis<sup>32</sup>. Thus, our findings disclose a  
314 molecular mechanism with clinical benefit to healthy lifespan extension and HGPS treatment.

315

### 316 **Acknowledgments**

317 All data are archived at the i3S Institute. We thank H. Maiato, J.M. Cabral and J. Bessa at i3S for  
318 critical discussions and reading of the manuscript; P. Sampaio and A. Maia for technical help

319 with Advanced Light Microscopy. E.L. holds an FCT Investigator Postdoctoral Grant  
320 (IF/00916/2014) from FCT/MCTES (Fundação para a Ciência e a Tecnologia/Ministério da  
321 Ciência, Tecnologia e Ensino Superior). FCT Fellowship (SFRH/BD/74002/2010) supported  
322 J.C.M. The following project grants supported this work: PTDC/BEX-BCM/2090/2014 funded  
323 by FCT; NORTE-01-0145-FEDER-000029 funded by North Regional Operational Program  
324 (NORTE2020) under PORTUGAL 2020 Partnership Agreement through Regional Development  
325 Fund (FEDER); NORTE-07-0124-FEDER-000003 co-funded by North Regional Operational  
326 Program (ON.2) through FEDER and by FCT; and POCI-01-0145-FEDER-007274 i3S  
327 framework project co-funded by COMPETE 2020/PORTUGAL 2020 through FEDER and by  
328 FCT; Foundation Pediatric Oncology Groningen grant and Dutch Cancer Society grant 2012-  
329 RUG-5549 to FF.

330

### 331 **Author Contributions**

332 J.C.M. initiated the project. J.C.M, S.V. and R.R. designed and performed the experiments, and  
333 analyzed the data. B.B. and P.B. performed RNA-sequencing and bioinformatics analysis. J.M.E.  
334 performed telomeric-FISH analysis. M.G.F., R.M. and F.F. contributed to the study design and  
335 edited the manuscript. E.L. conceived the idea, supervised the work and wrote the manuscript.  
336 All authors discussed results, prepared Fig.s and edited the manuscript.

337

### 338 **Competing Financial Interest**

339 The authors declare no competing financial interests.

340 Correspondence and requests for materials should be addressed to E.L.  
341 ([elsa.logarinho@ibmc.up.pt](mailto:elsa.logarinho@ibmc.up.pt)).

342

343 **References:**

- 344 1. Jacobs, P. A. & Court Brown, W. M. Age and chromosomes. *Nature* **212**, 823–4 (1966).
- 345 2. Nagaoka, S. I., Hassold, T. J. & Hunt, P. A. Human aneuploidy: mechanisms and new  
346 insights into an age-old problem. *Nat. Rev. Genet.* **13**, 493–504 (2012).
- 347 3. Stone, J. F. & Sandberg, A. A. Sex chromosome aneuploidy and aging. *Mutat. Res.*  
348 *DN Aging* **338**, 107–113 (1995).
- 349 4. Dumanski, J. P. *et al.* Mutagenesis. Smoking is associated with mosaic loss of  
350 chromosome Y. *Science* **347**, 81–3 (2015).
- 351 5. Guttenbach, M., Schakowski, R. & Schmid, M. Aneuploidy and ageing: sex chromosome  
352 exclusion into micronuclei. *Hum. Genet.* **94**, 295–8 (1994).
- 353 6. Mukherjee, A. B., Alejandro, J., Payne, S. & Thomas, S. Age-related aneuploidy analysis  
354 of human blood cells in vivo by fluorescence in situ hybridization (FISH). *Mech. Ageing*  
355 *Dev.* **90**, 145–56 (1996).
- 356 7. Mukherjee, A. B. & Thomas, S. A longitudinal study of human age-related chromosomal  
357 analysis in skin fibroblasts. *Exp. Cell Res.* **235**, 161–169 (1997).
- 358 8. Carere, A. *et al.* Analysis of chromosome loss and non-disjunction in cytokinesis-blocked  
359 lymphocytes of 24 male subjects. *Mutagenesis* **14**, 491–6 (1999).
- 360 9. Geigl, J. B. *et al.* Analysis of gene expression patterns and chromosomal changes  
361 associated with aging. *Cancer Res.* **64**, 8550–7 (2004).
- 362 10. Ly, D. H., Lockhart, D. J., Lerner, R. A. & Schultz, P. G. Mitotic misregulation and



- 363 human aging. *Science* **287**, 2486–92 (2000).
- 364 11. Baker, D. J. *et al.* BubR1 insufficiency causes early onset of aging-associated phenotypes  
365 and infertility in mice. *Nat. Genet.* **36**, 744–9 (2004).
- 366 12. Wijshake, T. *et al.* Reduced Life- and Healthspan in Mice Carrying a Mono-Allelic  
367 BubR1 MVA Mutation. *PLoS Genet.* **8**, e1003138 (2012).
- 368 13. Baker, D. J. *et al.* Increased expression of BubR1 protects against aneuploidy and cancer  
369 and extends healthy lifespan. *Nat. Cell Biol.* **15**, 96–102 (2013).
- 370 14. Ricke, R. M. & van Deursen, J. M. Aneuploidy in health, disease, and aging. *J. Cell Biol.*  
371 **201**, 11–21 (2013).
- 372 15. Gordon, D. J., Resio, B. & Pellman, D. Causes and consequences of aneuploidy in cancer.  
373 *Nat. Rev. Genet.* **13**, 189–203 (2012).
- 374 16. Tang, Y. C. & Amon, A. Gene copy-number alterations: A cost-benefit analysis. *Cell* **152**,  
375 394–405 (2013).
- 376 17. Williams, B. R. *et al.* Aneuploidy affects proliferation and spontaneous immortalization in  
377 mammalian cells. *Science* **322**, 703–9 (2008).
- 378 18. Thorburn, R. R. *et al.* Aneuploid yeast strains exhibit defects in cell growth and passage  
379 through START. *Mol. Biol. Cell* **24**, 1274–89 (2013).
- 380 19. Torres, E. M. *et al.* Effects of aneuploidy on cellular physiology and cell division in  
381 haploid yeast. *Science* **317**, 916–24 (2007).
- 382 20. Sheltzer, J. M., Torres, E. M., Dunham, M. J. & Amon, A. Transcriptional consequences  
383 of aneuploidy. *Proc. Natl. Acad. Sci. U. S. A.* **109** VN-, 12644–12649 (2012).

- 384 21. Sheltzer, J. M. *et al.* Aneuploidy drives genomic instability in yeast. *Science* **333**, 1026–30  
385 (2011).
- 386 22. Zhu, J., Pavelka, N., Bradford, W. D., Rancati, G. & Li, R. Karyotypic determinants of  
387 chromosome instability in Aneuploid budding yeast. *PLoS Genet.* **8**, e1002719 (2012).
- 388 23. Blank, H., Sheltzer, J., Meehl, C. & Amon, A. Mitotic entry in the presence of DNA  
389 damage is a widespread property of aneuploidy in yeast. *Mol. Biol. Cell* **26**, 2031–2037  
390 (2015).
- 391 24. Oromendia, A. B., Dodgson, S. E. & Amon, A. Aneuploidy causes proteotoxic stress in  
392 yeast. *Genes Dev.* **26**, 2696–708 (2012).
- 393 25. Stingle, S., Stoehr, G. & Storchova, Z. Activation of autophagy in cells with abnormal  
394 karyotype. *Autophagy* **9**, 246–8 (2013).
- 395 26. Donnelly, N., Passerini, V., Dürbaum, M., Stingle, S. & Storchová, Z. HSF1 deficiency  
396 and impaired HSP90-dependent protein folding are hallmarks of aneuploid human cells.  
397 *EMBO J.* **33**, 2374–87 (2014).
- 398 27. Macedo, J. C., Vaz, S. & Logarinho, E. Mitotic Dysfunction Associated with Aging  
399 Hallmarks. *Adv. Exp. Med. Biol.* **1002**, 153–188 (2017).
- 400 28. Goldman, R. D. *et al.* Accumulation of mutant lamin A causes progressive changes in  
401 nuclear architecture in Hutchinson-Gilford progeria syndrome. *Proc. Natl. Acad. Sci. U. S.*  
402 *A.* **101**, 8963–8 (2004).
- 403 29. Cristofalo, V. J., Allen, R. G., Pignolo, R. J., Martin, B. G. & Beck, J. C. Relationship  
404 between donor age and the replicative lifespan of human cells in culture: a reevaluation.  
405 *Proc. Natl. Acad. Sci. U. S. A.* **95**, 10614–9 (1998).

- 406 30. Childs, B. G., Durik, M., Baker, D. J. & van Deursen, J. M. Cellular senescence in aging  
407 and age-related disease: from mechanisms to therapy. *Nat. Med.* **21**, 1424–1435 (2015).
- 408 31. Dimri, G. P. *et al.* A biomarker that identifies senescent human cells in culture and in  
409 aging skin in vivo. *Proc. Natl. Acad. Sci. U. S. A.* **92**, 9363–7 (1995).
- 410 32. Baker, D. J. *et al.* Clearance of p16Ink4a-positive senescent cells delays ageing-associated  
411 disorders. *Nature* **479**, 232–6 (2011).
- 412 33. Rodier, F. & Campisi, J. Four faces of cellular senescence. *Journal of Cell Biology* **192**,  
413 547–556 (2011).
- 414 34. Hayashi, M. T., Cesare, A. J., Rivera, T. & Karlseder, J. Cell death during crisis is  
415 mediated by mitotic telomere deprotection. *Nature* **522**, 492–6 (2015).
- 416 35. Galli, M. & Morgan, D. O. Cell Size Determines the Strength of the Spindle Assembly  
417 Checkpoint during Embryonic Development. *Dev. Cell* **36**, 344–52 (2016).
- 418 36. Cimini, D. *et al.* Merotelic kinetochore orientation is a major mechanism of aneuploidy in  
419 mitotic mammalian tissue cells. *J. Cell Biol.* **153**, 517–27 (2001).
- 420 37. Aird, K. M. *et al.* HMGB2 orchestrates the chromatin landscape of senescence-associated  
421 secretory phenotype gene loci. *Journal of Cell Biology* **215**, 325–334 (2016).
- 422 38. Müller, G. A., Stangner, K., Schmitt, T., Wintsche, A. & Engeland, K. Timing of  
423 transcription during the cell cycle: Protein complexes binding to E2F, E2F/CLE,  
424 CDE/CHR, or CHR promoter elements define early and late cell cycle gene expression.  
425 *Oncotarget* (2016). doi:10.18632/oncotarget.10888
- 426 39. Sadasivam, S., Duan, S. & DeCaprio, J. A. The MuvB complex sequentially recruits B-  
427 Myb and FoxM1 to promote mitotic gene expression. *Genes Dev.* **26**, 474–89 (2012).

- 428 40. Laoukili, J. *et al.* FoxM1 is required for execution of the mitotic programme and  
429 chromosome stability. *Nat. Cell Biol.* **7**, 126–36 (2005).
- 430 41. Wang, X. *et al.* Increased levels of forkhead box M1B transcription factor in transgenic  
431 mouse hepatocytes prevent age-related proliferation defects in regenerating liver. *Proc.*  
432 *Natl. Acad. Sci. U. S. A.* **98**, 11468–73 (2001).
- 433 42. Smirnov, A. *et al.* FOXM1 regulates proliferation, senescence and oxidative stress in  
434 keratinocytes and cancer cells. *Aging (Albany, NY)*. **8**, 1384–97 (2016).
- 435 43. Fischer, M., Grossmann, P., Padi, M. & DeCaprio, J. A. Integration of TP53, DREAM,  
436 MMB-FOXM1 and RB-E2F target gene analyses identifies cell cycle gene regulatory  
437 networks. *Nucleic Acids Res.* **44**, 6070–86 (2016).
- 438 44. Laoukili, J. *et al.* Activation of FoxM1 during G2 requires cyclin A/Cdk-dependent relief  
439 of autorepression by the FoxM1 N-terminal domain. *Mol. Cell. Biol.* **28**, 3076–87 (2008).
- 440 45. Laoukili, J., Alvarez-Fernandez, M., Stahl, M. & Medema, R. H. FoxM1 is degraded at  
441 mitotic exit in a Cdh1-dependent manner. *Cell Cycle* **7**, 2720–6 (2008).
- 442 46. Baker, D. J. *et al.* Early aging-associated phenotypes in Bub3/Rae1 haploinsufficient  
443 mice. *J. Cell Biol.* **172**, 529–40 (2006).
- 444 47. Andriani, G. A. *et al.* Whole Chromosome Instability induces senescence and promotes  
445 SASP. *Sci. Rep.* **6**, 35218 (2016).
- 446 48. Partridge, L. Intervening in ageing to prevent the diseases of ageing. *Trends Endocrinol.*  
447 *Metab.* **25**, 555–557 (2014).
- 448 49. Behrens, A., van Deursen, J. M., Rudolph, K. L. & Schumacher, B. Impact of genomic  
449 damage and ageing on stem cell function. *Nat. Cell Biol.* **16**, 201–7 (2014).

- 450 50. Childs, B. G. *et al.* Senescent intimal foam cells are deleterious at all stages of  
451 atherosclerosis. *Science (80-. )*. **354**, 472 LP-477 (2016).
- 452 51. Krenning, L., Feringa, F. M., Shaltiel, I. A., van den Berg, J. & Medema, R. H. Transient  
453 activation of p53 in G2 phase is sufficient to induce senescence. *Mol. Cell* **55**, 59–72  
454 (2014).
- 455 52. Johmura, Y. *et al.* Necessary and sufficient role for a mitosis skip in senescence induction.  
456 *Mol. Cell* **55**, 73–84 (2014).
- 457 53. Dikovskaya, D. *et al.* Mitotic Stress Is an Integral Part of the Oncogene-Induced  
458 Senescence Program that Promotes Multinucleation and Cell Cycle Arrest. *Cell Rep.* **12**,  
459 1483–96 (2015).
- 460 54. Salminen, A., Kauppinen, A. & Kaarniranta, K. Emerging role of NF- $\kappa$ B signaling in the  
461 induction of senescence-associated secretory phenotype (SASP). *Cellular Signalling* **24**,  
462 835–845 (2012).
- 463 55. Uetake, Y. & Sluder, G. Prolonged prometaphase blocks daughter cell proliferation  
464 despite normal completion of mitosis. *Curr. Biol.* **20**, 1666–1671 (2010).
- 465 56. Santaguida, S. & Amon, A. Short- and long-term effects of chromosome mis-segregation  
466 and aneuploidy. *Nat. Rev. Mol. Cell Biol.* **16**, 473–485 (2015).
- 467 57. Anders, L. *et al.* A systematic screen for CDK4/6 substrates links FOXM1  
468 phosphorylation to senescence suppression in cancer cells. *Cancer Cell* **20**, 620–34  
469 (2011).
- 470 58. de Magalhães, J. P. *et al.* The Human Ageing Genomic Resources: online databases and  
471 tools for biogerontologists. *Aging Cell* **8**, 65–72 (2009).

- 472 59. Horvath, S. DNA methylation age of human tissues and cell types. *Genome Biol.* **14**, R115  
473 (2013).
- 474 60. Khongkow, P. *et al.* FOXM1 targets NBS1 to regulate DNA damage-induced senescence  
475 and epirubicin resistance. *Oncogene* **33**, 4144–55 (2014).
- 476 61. Kalinichenko, V. V *et al.* Ubiquitous expression of the forkhead box M1B transgene  
477 accelerates proliferation of distinct pulmonary cell types following lung injury. *J. Biol.*  
478 *Chem.* **278**, 37888–94 (2003).
- 479 62. Ocampo, A. *et al.* In Vivo Amelioration of Age-Associated Hallmarks by Partial  
480 Reprogramming. *Cell* **167**, 1719–1733.e12 (2016).

481

## 482 **Methods**

### 483 *Cell culture*

484 A total of 11 human fibroblast cultures, established from skin samples of Caucasian males with  
485 ages ranging from neonatal to octogenarian (two biological samples per age), were acquired from  
486 cell biobanks as summarized (Supplementary Fig.1A). Several time points over the human  
487 lifespan were included to reinforce the validity of any correlation found. All donors were  
488 reported as “healthy”, except the 8 years-old donor diagnosed with the Hutchison-Gilford  
489 progeria. Human dermal fibroblasts (HDFs) were seeded at  $1 \times 10^4$  cells per  $\text{cm}^2$  of growth area  
490 in minimal essential medium Eagle-Earle (MEM) supplemented with 15% fetal bovine serum  
491 (FBS), 2.5 mM L-glutamine and 1x antibiotic-antimycotic (all from Gibco, Thermo Fisher  
492 Scientific, CA, USA). Only early passage dividing fibroblasts (population doubling PDL<24)  
493 were used in all experiments.  $PDL=3.32 (\log UCY - \log I) + X$ , where UCY = the cell yield at

494 that point,  $l$  = the cell number used to begin that subculture, and  $X$  = the doubling level of the  
495 cells used to initiate the subculture being quantitated. Murine adult fibroblasts (MAFs) were  
496 cultured in Dulbecco's Modified Eagle Medium (DMEM) supplemented with nutrient mixture F-  
497 12, 10% FBS, L-glutamine and antibiotic-antimycotic (all from Gibco). All cells were grown at  
498 37 °C and humidified atmosphere with 5% CO<sub>2</sub>.

499

#### 500 *Isolation of mouse fibroblasts*

501 Sv/129 mice were housed and handled accordingly to European Union and national legislation.  
502 Murine adult fibroblasts were collected from ears of  $n > 3$  sv/129 females of the same litter at their  
503 age of 8 weeks, 6 months, 1 year, 1.5 years and 2 years. Ears were washed with phosphate-  
504 buffered saline (PBS), cut into small pieces, and incubated with 1 mg/ml collagenase D and  
505 1 mg/ml collagenase/dispase (both from Roche Applied Science, Germany) in DMEM:F12  
506 without FBS, for 45 min at 37 °C and 5% CO<sub>2</sub>. Cells were then grown on a 6-well dish  
507 containing DMEM:F12, supplemented with 10% FBS and antibiotic-antimycotic.

508

#### 509 *Drug treatments*

510 Fibroblasts were incubated for 24 h in medium containing 2 µg/ml cytochalasin D (C8273,  
511 Sigma-Aldrich, MO, USA) to block cytokinesis. For SAC inhibition, cells were treated with  
512 5 µM Mps1 inhibitor<sup>63</sup> (AZ3146, TOCRIS, USA). For proteasome activity enhancement, 10 µM  
513 of Usp14 inhibitor<sup>64</sup> were used (I-300, BostonBiochem, Cambridge, MA). To measure spindle  
514 mispositioning in metaphase cells, proteasome was inhibited with 5 µM MG132 (474790,  
515 Calbiochem, CA, USA) for 1.5 h. To inhibit kinesin-5, S-Trityl-L-cysteine (STLC) (2799-07-7,  
516 Tocris, USA) was used at different concentrations depending on the experiment: 5 µM during

517 16 h to enrich the mitotic index for mitotic cell shake-off, and 2.5  $\mu$ M for 2 h if followed by a  
518 washout. Aurora kinase inhibitor ZM447439 (2458, AstraZeneca, Alderley Park, UK) was used  
519 at 500 nM for 18 h to artificially induce aneuploidy<sup>65</sup>.

520

#### 521 *Fluorescence in situ hybridization (FISH)*

522 Fibroblasts were grown on Superfrost™ Plus microscope slides (Menzel, Thermo Scientific, CA,  
523 USA) placed in a quadriperm dish (Sarsted, Nümbrecht, Germany). In both interphase and  
524 binucleated cell FISH, cells were given a hypotonic shock during 30 min (0.03 M sodium citrate,  
525 Sigma-Aldrich, MO, USA), followed by fixation in ice-cold Carnoy fixative added drop-wise  
526 and incubated for 5 min. This step was repeated two more times. FISH was performed with the  
527 Vysis centromeric probes CEP7 Spectrum Aqua, CEP12 Spectrum Green and CEP18 Spectrum  
528 Orange (Abbott Laboratories, Chicago, IL, USA) according to manufacturer's instructions.  
529 Slides were mounted with mounting medium containing DAPI (Vectashield, Vector  
530 Laboratories, CA, USA).

531

#### 532 *Senescence-associated $\beta$ -galactosidase assay*

533 In fixed cell analysis, cells were incubated for 90 min in medium with 100 nM Bafilomycin A1  
534 (B1793, Sigma-Aldrich, MO, USA) to induce lysosomal alkalization. 33  $\mu$ M of fluorogenic  
535 substrate for  $\beta$ -galactosidase, fluorescein di- $\beta$ -D-galactopyranoside (F2756, Sigma-Aldrich, MO,  
536 USA) were then added to the medium, and incubation carried out for 90 min. Cells were fixed in  
537 4% paraformaldehyde for 15 min, rinsed with PBS and permeabilized with 0.1% Triton-X100 in  
538 PBS for 15 min. Finally, cells were counterstained with 1  $\mu$ g/ml DAPI (Sigma-Aldrich, MO,  
539 USA). For fluorescence-activated cell sorting, cells were incubated in Bafilomycin A1 as



540 described above and then exposed to 10  $\mu$ M of fluorogenic substrate for  $\beta$ -galactosidase, 9H-  
541 (1,3-Dichloro-9,9-Dimethylacridin-2-One-7-yl)  $\beta$ -D-Galactopyranoside (DDAOG) for 90 min  
542 (Setareh Biotech LLC, USA).

543

#### 544 *Fluorescence-activated cell sorting (FACS)*

545 FACS was used to isolate subpopulations of senescent (SA- $\beta$ -gal positive) live fibroblasts. FACS  
546 sorting was performed in FACS Aria™ I Cell Sorter (BD Biosciences, CA, USA), using the  
547 laser-line of 633 nm. All cells within a single experiment were detected using the same voltage  
548 settings and sorted using an 85  $\mu$ m nozzle. Cells were initially gated by forward scatter-area  
549 (FSC-A) vs. side scatter-area (SSC-A), which excludes dead cells and subcellular debris, with  
550 subsequent exclusion of cell doublets and clumps through FSC-A vs. FSC-width (FSC-W) plot.  
551 The signal was detected using the APC-A channel. The relative  $\beta$ -galactosidase activity was  
552 inferred from the median fluorescence intensity of the population. The sorting gates were  
553 designed accordingly to the respective auto-fluorescent control. Cells were sorted directly into  
554 MEM with 15% FBS, and seeded in Superfrost™ Plus microscope slides for subsequent FISH  
555 analysis. Analysis of FACS-data was done using FlowJo v10 software (TreeStar, Inc, Ashland,  
556 OR).

557

#### 558 *Immunostaining*

559 Fibroblasts were grown on sterilized glass coverslips coated with 50  $\mu$ g/ml fibronectin (F1141,  
560 Sigma-Aldrich, MO, USA). For analysis of 53BP1 and Cdkn1a/p21 biomarkers, cells were fixed  
561 in freshly prepared 4% paraformaldehyde in PBS for 20 min, whereas for spindle angle analysis,  
562 cells were fixed in ice-cold methanol for 4 min. Following fixation, cells were rinsed in PBS and

563 permeabilized in PBS + 0.3% Triton-X100 for 7 min. Cells were next blocked in 10% FBS in  
564 PBS-T (PBS + 0.05% Tween-20) for 1 h, and then incubated overnight at 4 °C with primary  
565 antibodies diluted in PBS-T + 5% FBS as follows: rabbit anti-53BP1 (#4937, Cell Signaling  
566 Technology, MA, USA), 1:100; mouse anti-p21 (SC-6246, Santa Cruz Biotechnology, CA,  
567 USA), 1:1,000; mouse anti- $\alpha$ -tubulin (T5168, Sigma-Aldrich, MO, USA), 1:1,500; rabbit  
568 anti-CP110 (a gift from Mónica Bettencourt-Dias, IGC, Portugal), 1:100. Secondary antibodies  
569 AlexaFluor-488 and -568 (Life Technologies CA, USA) were diluted 1:1,500 in PBS-T + 5%  
570 FBS. DNA was counterstained with 1  $\mu$ g/ml DAPI (Sigma-Aldrich, MO, USA). Coverslips were  
571 mounted in slides with mounting solution (90% glycerol, 0.5% N-propyl-gallate, 20 nM Tris,  
572 pH 8).

573

#### 574 *Telomere PNA FISH*

575 Fibroblasts were incubated in 0.05  $\mu$ g/ml colcemid (15212012, Gibco, Thermo Fisher Scientific,  
576 CA, USA) for 4 h, to induce metaphase arrest. Following trypsinization, fibroblasts were  
577 incubated in 0.03 M sodium citrate for 30 min at 37 °C. Cells were then fixed in freshly made  
578 Carnoy fixative solution and stored at 4 °C. Metaphase spreads were fixed with 4%  
579 formaldehyde in PBS for 2 min, followed by pepsin digestion (1 mg/ml) for 10 min at 37 °C.  
580 After a dehydration step with ethanol, dried slides were hybridized with Telomere-PNA probe  
581 (Applied Biosystems, CA, USA) (0.5  $\mu$ g/ml) in 10 mM Tris pH 7.5, 70% formamide, 0.25%  
582 blocking reagent (Roche, Germany), 2 mM MgCl<sub>2</sub>, 700  $\mu$ M citric acid, 7 mM Na<sub>2</sub>HPO<sub>4</sub>, for  
583 3 min in a hot plate at 80 °C and then for 2 h at 37 °C in humidified chamber. Slides were washed  
584 in 70% formamide, 10 mM Tris, 0.1% BSA twice for 15 min, then washed 3 times in Tris-

585 buffered saline (TBS) for 5 min, and finally mounted with mounting media containing DAPI  
586 (Vectashield, Vector Laboratories, CA, USA).

587

### 588 *Microscopy and image analysis*

589 *Phase-contrast live cell imaging.* Fibroblasts were grown in glass-bottom 35mm  $\mu$ -dishes (Ibidi  
590 GmbH, Germany), coated with 50  $\mu$ g/ml fibronectin (F1141, Sigma-Aldrich, MO, USA). Images  
591 were acquired on a Zeiss Axiovert 200M inverted microscope (Carl Zeiss, Oberkochen,  
592 Germany) equipped with a CoolSnap camera (Photometrics Tucson, USA), XY motorized stage  
593 and NanoPiezo Z stage, under controlled temperature, atmosphere and humidity. Neighbor fields  
594 (20-25) were imaged every 2.5 min for 2-3 days, using a 20x 0.3NA A-Plan objective. Stitching  
595 of neighboring fields was done using the plugin “Stitch Grid” (Stephan Preibisch) from  
596 ImageJ/Fiji software.

597 *Spinning-disk confocal microscopy.* Four-dimensional data sets were collected with Andor  
598 Revolution XD spinning-disk confocal system (Andor Technology, Belfast, UK), equipped with  
599 an electron multiplying CCD iXonEM Camera and a Yokogawa CSU 22 unit based on an  
600 Olympus IX81 inverted microscope (Olympus, Southend-on-Sea, UK). Two laser lines at 488  
601 and 561 nm were used for the excitation of GFP and mCherry and the system was driven by  
602 Andor IQ software. Z-stacks (0.8-1.0  $\mu$ m) covering the entire volume of the mitotic cells were  
603 collected every 1.5 min with a PlanApo 60x 1.4NA objective. All images represent maximum-  
604 intensity projections of all z planes. ImageJ/Fiji software was used to edit the movies.

605 *Fluorescence microscopy.* Analysis of the SA- $\beta$ -galactosidase fluorescence assay was carried out  
606 on a Zeiss AxioImager Z1 (Carl Zeiss, Oberkochen, Germany) equipped with an AxioCam MR  
607 and using an EC-Plan-Neofluor 40x 1.3NA objective. Cells displaying >5 fluorescent granules

608 were considered positive for SA- $\beta$ -gal activity. Calculation of spindle angle in relation to growth  
609 surface was done in images acquired as optimal distance z-stacks on a Zeiss AxioImager Z1  
610 using a Plan-Apochromat 63x 1.4NA objective. AutoQuant X2 (Media Cybernetics, Rockville,  
611 USA) was used for image deconvolution and generation of different axes projections.

612 *Automated microscopy.* Image fields of 53BP1/p21 double immunostaining and FISH staining  
613 were acquired on IN Cell Analyzer 2000 (GE Healthcare, UK), equipped with a Photometrics  
614 CoolSNAP K4 camera and using a Nikon 20x 0.45NA Plan Fluor objective. Fluorescence  
615 intensity thresholds were set by eye and used consistently for samples within each experiment.

616 *Image analysis.* Fixed cell experiments (FISH, SA biomarkers and micronuclei) were blindly  
617 quantified using ImageJ/Fiji software. Mitotic duration, asynchronous daughter cell adherence  
618 and cytokinesis failure were quantified from phase-contrast movies. Quantifications in Fig. 2e  
619 and Fig. 2g were from spinning-disk confocal movies.

620

#### 621 *Western blotting*

622 Mitotic cell populations were collected by shaking off cell culture flasks enriched for mitotic  
623 index (MI) by a 16 h treatment with STLC. MI>95% was determined by visual scoring of cells  
624 with condensed chromosomes after Carnoy fixation, followed by with 1  $\mu$ g/ml DAPI in PBS.  
625 Lysis buffer (150 mM NaCl, 10 mM Tris-HCl pH 7.4, 1 mM EDTA, 1 mM EGTA, 0.5% IGEPAL)  
626 with protease inhibitors was added to mitotic cell pellets, and lysates quantified for protein  
627 content by the Lowry Method (DC™ Protein Assay, BioRad, CA, USA). 20  $\mu$ g of total extract  
628 were then loaded in SDS-PAGE gels and transferred onto nitrocellulose membranes for western  
629 blot analysis. Membranes were blocked during 1 h with TBS containing 5% low-fat milk.  
630 Primary antibodies were diluted in TBS containing 2% low-fat milk as follows: rabbit anti-

631 FoxM1 (#13147, ProteinTech Group Inc, IL, USA), 1:1,000; mouse anti  $\alpha$  tubulin (T5168,  
632 Sigma-Aldrich, CA, USA), 1:50,000; and mouse anti-GAPDH (#60004, ProteinTech Group Inc,  
633 IL, USA), 1:30,000. Goat anti-rabbit (SC-2004, Santa Cruz Biotechnology, CA, USA) and goat  
634 anti-mouse (SC-2005, Santa Cruz Biotechnology, CA, USA) HRP-conjugated secondary  
635 antibodies were diluted at 1:3,000 in TBS containing 2% low fat milk. Signal was detected using  
636 Clarity Western ECL Substrate reagent (Bio-Rad Laboratories, CA, USA) accordingly to  
637 manufacturer's instructions. A GS-800 calibrated densitometer with Quantity One 1-D Analysis  
638 Softwar 4.6 (Bio-Rad Laboratories, CA, USA) was used for quantitative analysis of protein  
639 levels.

640

#### 641 *Lentiviral plasmids*

642 H2B-GFP<sup>66</sup> was amplified as a Bg/II-H2B-GFP-T2A-BamHI-NotI fragment. This PCR  
643 fragment was digested with Bg/II+NotI and ligated into pRetrox-Tight-Puro (Clontech, CA,  
644 USA) digested with BamHI+NotI, thus destroying the 5' BamHI/Bg/II site while reintroducing a  
645 BamHI site 3' of H2B-GFP-T2A. In parallel,  $\alpha$ -Tubulin<sup>66</sup> was amplified as a Bg/II- $\alpha$ -Tubulin-  
646 BamHI-NotI fragment and ligated into pRetrox-Tight-Puro digested with BamHI+NotI, again  
647 destroying the 5' BamHI/Bg/II site while reintroducing a BamHI site 3' of  $\alpha$ -Tubulin. mCherry  
648 was amplified from pExchange-1-Cherry (Agilent Technologies, CA, USA) as a Bg/II-mCherry-  
649 NotI fragment and was ligated into pRetrox- $\alpha$ -Tubulin digested with BamHI-NotI, yielding  
650 pRetrox- $\alpha$ -Tubulin-mCherry. Finally,  $\alpha$ -Tubulin-mCherry was PCR-amplified as a Bg/II- $\alpha$ -  
651 Tubulin-mCherry-NotI fragment and ligated into pRetrox-H2B-GFP-T2A digested with  
652 BamHI+NotI, yielding pRetrox-H2B-GFP-T2A- $\alpha$ -Tubulin-mCherry. To obtain pLVX-  
653 Tight-Puro-H2B-GFP-T2A- $\alpha$ -tubulin-mCherry, a Bg/II-H2B-GFP-T2A- $\alpha$ -Tubulin-mCherry-

654 *NotI* fragment was amplified from pRetroX-H2B-T2A-GFP- $\alpha$ -Tubulin-mCherry and ligated into  
655 pLVX-Tight-Puro (Clontech, CA, USA) digested with *BamHI*+*NotI*. To generate  
656 pLVX-Tight-Puro-FoxM1dNdK, a *BglII*-FOXM1-dNdK-*NotI* fragment was amplified from  
657 pcDNA3-Flag- $\Delta$ N- $\Delta$ KEN-FoxM1<sup>44</sup> and ligated into pLVX-Tight-Puro digested with  
658 *BamHI*+*NotI*. Primers used are described in Supplementary Table 3.

659

#### 660 *Lentiviral production and infection*

661 Lentiviruses were produced according to the protocol described in Lenti-X Tet-ON Advanced  
662 Inducible Expression System (Clontech). Lentiviruses carrying empty pLVX-Tight-Puro, pLVX-  
663 Tight-Puro-H2B-GFP- $\alpha$ -Tubulin-mCherry or pLVX-Tight-Puro-FoxM1dNdK, as well as  
664 lentiviruses carrying pLVX-Tet-On Advanced (which expresses rtTA), were generated in  
665 HEK293T helper cells transfected with packaging plasmids (pMd2.G and psPAX2) using  
666 Lipofectamine 2000 (Life Technologies, Thermo Scientific, CA, USA). Human fibroblasts were  
667 co-infected for 12-16 h with responsive and transactivator lentiviruses at 2:1 ratio, in the  
668 presence of 8  $\mu$ g/ml polybrene (AL-118, Sigma-Aldrich, MO, USA). In the following day,  
669 750 ng/ml doxycycline (D9891, Sigma-Aldrich, MO, USA) was added to the medium to induce  
670 co-transduction. Phenotypes were analyzed and quantified 48-72 h later, and transfection  
671 efficiency monitored by scoring the number of fluorescent cells or by western blotting.

672

#### 673 *FoxM1 RNA interference*

674 Cells were transfected 1 h after plating, with 45 nM FoxM1 siRNA (SASI\_Hs01\_00243977 from  
675 Sigma-Aldrich, MO, USA) using Lipofectamine RNAiMAX (Thermo Scientific, CA, USA)

676 according to manufacturer's instructions. Phenotypes were analyzed and quantified 72 h post  
677 transfection, and depletion efficiency monitored by western blotting.

678

#### 679 *Real-time PCR*

680 Total RNA was obtained from mitotic fibroblasts (collected as depicted in Fig. 3a and in the  
681 Western blotting section) using the RNeasy® Mini kit (Qiagen, Hilden, Germany). RNA purity  
682 and integrity was confirmed in the Experion™ system (Bio-Rad Laboratories, CA, USA). cDNA  
683 was synthesized from total RNA (1 µg) using iScript Advanced Select cDNA Synthesis kit  
684 (BioRad Laboratories, CA, USA). The 2- $\Delta\Delta$ Ct method was used to quantify the transcript levels  
685 of FOXM1 against the transcript levels of the housekeeping gene (TBP/GAPDH). Primers were  
686 designed to span at least one exon-intron junction (Supplementary Table 3). Amplification was  
687 performed in a C1000 Touch Thermal Cycler (CFX384 Real-Time System, Bio-Rad  
688 Laboratories, CA, USA), and analyzed using CFX Manager Software (Bio-Rad Laboratories,  
689 CA, USA).

690

#### 691 *RNA sequencing and bioinformatics*

692 RNA was isolated from mitotic human fibroblasts and validated as described above for  
693 PrimePCR assay. RNA-sequencing libraries were prepared using TruSeq Stranded Total RNA  
694 with Ribo-Zero Human/Mouse/Rat (RS-122-2201; Illumina, CA, USA) according to  
695 manufacturer's protocol. Pooled libraries were sequenced on an Illumina HiSeq 2500 (single-end  
696 50 bp). Reads were aligned to the human genome (hg19) using a splicing-aware aligner  
697 (StarAligner). Aligned reads were FPM normalized, excluding low abundance genes (mean  
698 FPM>1). Differential gene expression analysis was performed using the R-package edgeR

699 (v3.14.0 available from Bioconductor at  
700 <http://www.bioconductor.org/packages/release/bioc/html/edgeR.html>). Significant differential  
701 gene expression of aged fibroblasts was defined as  $p$ -value $<0.05$  and of genetic manipulations as  
702 a 2-logFC cutoff value  $<-0.7$  or  $>0.7$ , FDR $<0.05$  and  $p$ -value $<0.05$  (Supplementary Table 1). For  
703 generation of RNA-seq heatmaps, FPM normalized read counts were used. Hierarchical  
704 clustering was performed using the R library heatmap.2. RNA-seq data of HDF N vs 87y  
705 represent two biological replicates of each biological sample from a single experiment. The  
706 RNA-seq data from FoxM1 RNAi and dNdK viral infection represent two technical replicates of  
707 each biological sample. For ontological analysis, differentially expressed genes were analyzed  
708 using Database for Annotation, Visualization and Integrated Discovery (DAVID) Functional  
709 Annotation Tool v6.8 <sup>67</sup> ([www.david-d.ncifcrf.gov](http://www.david-d.ncifcrf.gov)). To calculate the significance of gene set  
710 enrichment, empirical  $p$ -values were generated using DAVID tool. Genes differentially  
711 expressed following FoxM1 RNAi (dataset: 4451 genes) were overlapped with those  
712 differentially expressed following FoxM1dNdK expression (dataset: 2,199 genes). Overlap  
713 analysis was also performed with a dataset of 249 genes reported as targets of both DREAM and  
714 MMB-FoxM1 complexes <sup>43</sup> (Supplementary Table 2). Gene ontology (GO) term enrichment  
715 analysis was performed using DAVID Functional Annotation Tool.

716

### 717 *Statistical Analysis*

718 Sample sizes and statistical tests for each experiment are indicated in the Fig. legends.  $p$ -values  
719 were obtained using GraphPad Prism version 6 (GraphPad, San Diego, CA, USA). Data were  
720 tested for parametric vs. non-parametric distribution using D'Agostino-Pearson omnibus  
721 normality test. Spearman rank correlation, Mann-Whitney, two-tailed  $\chi^2$ -square or one-way



722 ANOVA for multiple comparisons tests were then applied accordingly. ns:  $p > 0.05$ ,  $*p \leq 0.05$ ,  
723  $**p \leq 0.01$ ,  $***p \leq 0.001$  and  $****p \leq 0.0001$ . Values are shown as mean  $\pm$  s.d. or mean  $\pm$  s.e.m.  
724 When required, box-and-whisker plot with median, IQR and minimum and maximum values was  
725 used.

726

727 63. Kwiatkowski, N. *et al.* Small-molecule kinase inhibitors provide insight into Mps1 cell  
728 cycle function. *Nat. Chem. Biol.* **6**, 359–68 (2010).

729

730 64. Lee, B.-H. *et al.* Enhancement of proteasome activity by a small-molecule inhibitor of  
731 USP14. *Nature* **467**, 179–84 (2010).

732 65. Cimini, D., Wan, X., Hirel, C. B. & Salmon, E. D. Aurora kinase promotes turnover of  
733 kinetochore microtubules to reduce chromosome segregation errors. *Curr. Biol.* **16**, 1711–  
734 8 (2006).

735 66. Orth, J. D. *et al.* Analysis of mitosis and antimetabolic drug responses in tumors by in vivo  
736 microscopy and single-cell pharmacodynamics. *Cancer Res.* **71**, 4608–16 (2011).

737 67. Huang, D. W., Sherman, B. T. & Lempicki, R. A. Systematic and integrative analysis of  
738 large gene lists using DAVID bioinformatics resources. *Nat. Protoc.* **4**, 44–57 (2009).

739

740

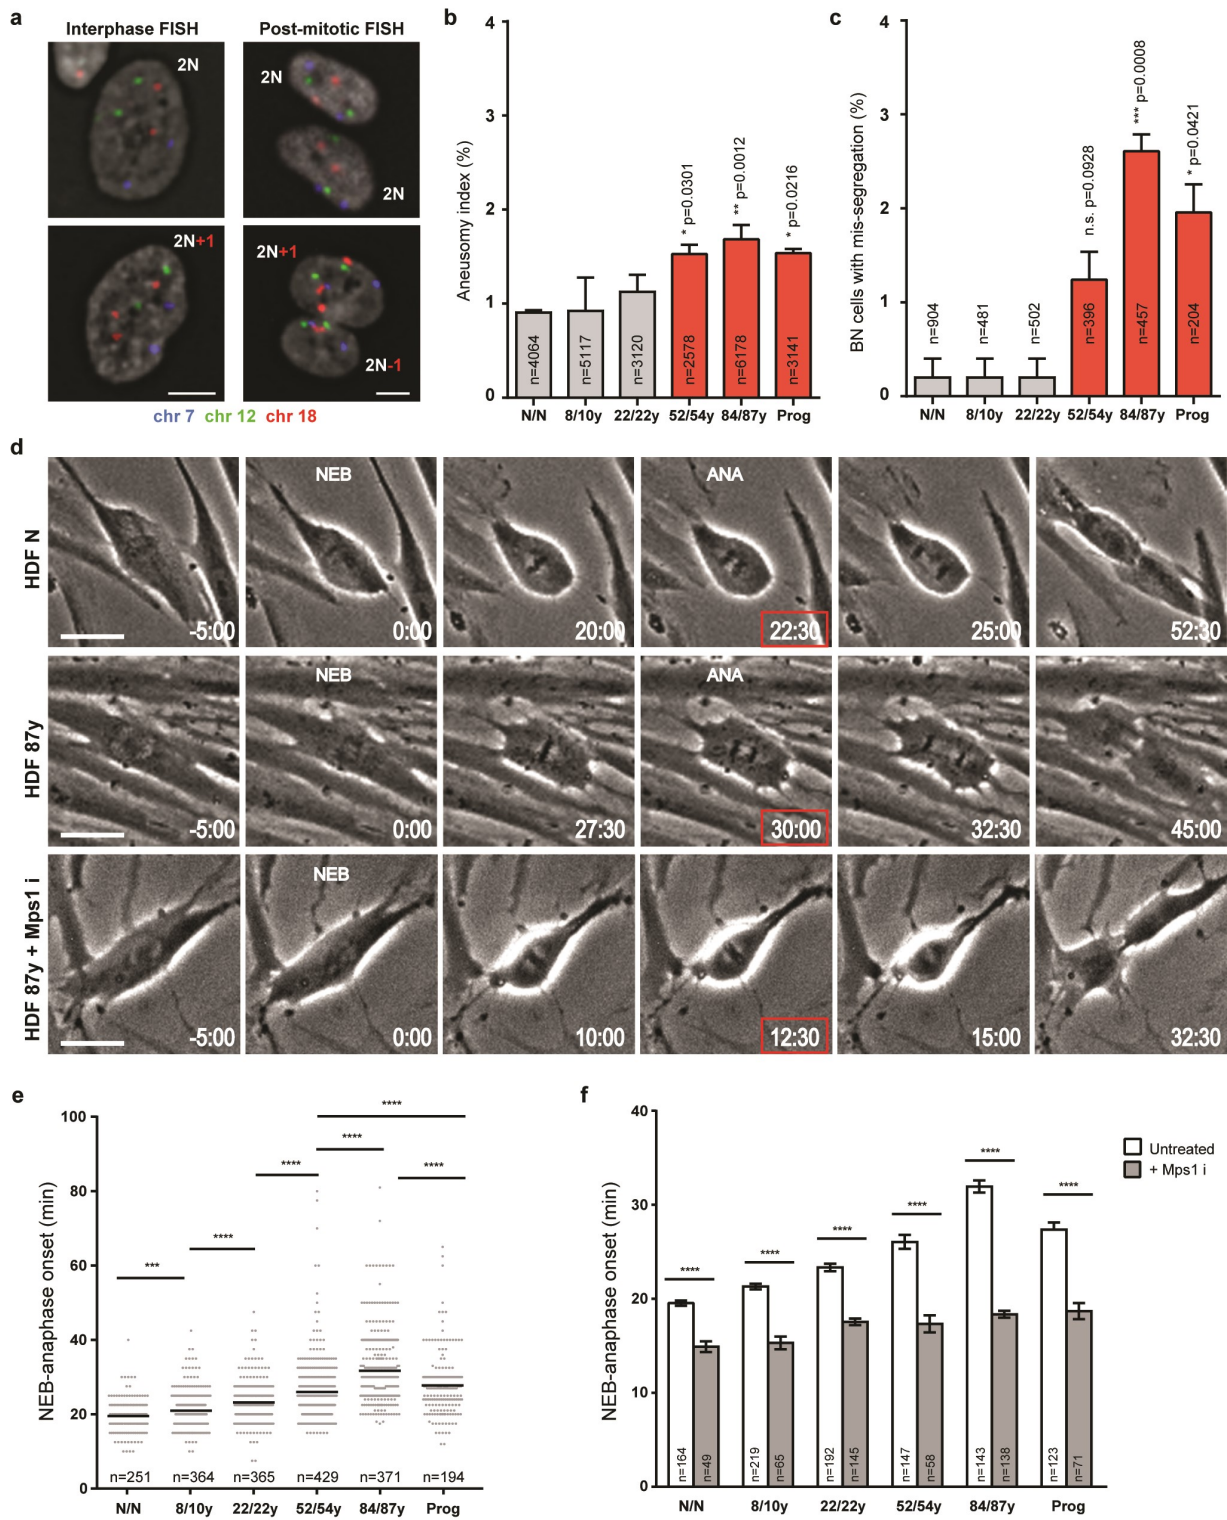

742 **Figure 1. Aneuploidy and mitotic duration increase during normative aging. (a)** FISH in  
743 interphase and post-mitotic cells with chromosome-specific centromeric probes as indicated.  
744 Representative images of euploid/2N and aneuploid/2N±1 cells are shown. Scale bars, 5 μm. **(b)**  
745 Aneusomy index in interphase cells from different age donors. **(c)** Percentage of post-mitotic  
746 cells with chromosome mis-segregation. **(d)** Frame series of time-lapse phase-contrast movies of  
747 mitotic neonatal and elderly cells±Mps1 inhibitor. Mitotic duration was measured from nuclear  
748 envelope breakdown (NEB) to anaphase onset (ANA). Time, min:sec. Scale bar, 20 μm. **(e)**  
749 Mitotic duration of individual fibroblasts from different donors. **(f)** Mitotic duration under  
750 standard conditions as in (e) (white bars) and following treatment with Mps1 inhibitor (gray  
751 bars). Values are mean ± s.d. from at least three independent experiments, using two biological  
752 samples of similar age (except for progeria). Sample size (n) is indicated in each graph. n.s.  
753  $p>0.05$ ,  $*p\leq 0.05$ ,  $**p\leq 0.01$ ,  $***p\leq 0.001$  and  $****p\leq 0.0001$  in comparison to neonatal (N/N) by  
754 two-tailed  $\chi^2$  (b,c) and Mann-Whitney (e,f) statistical tests.

755

756

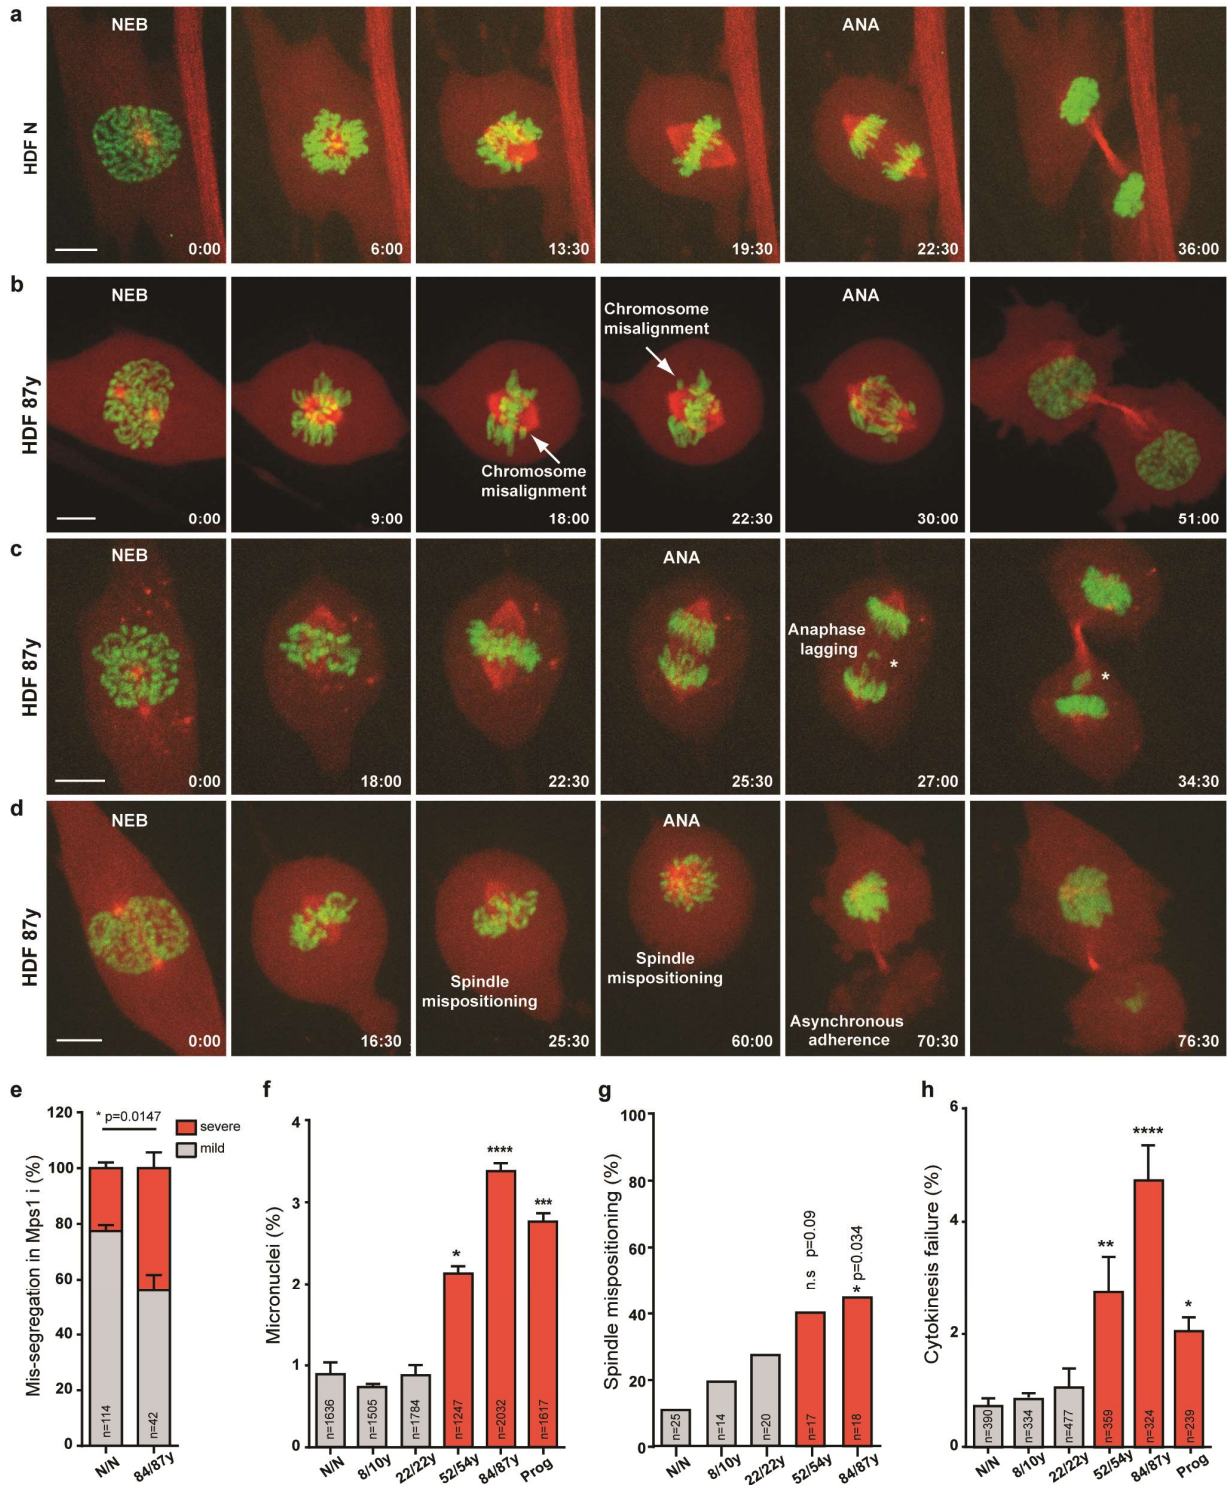

758 **Figure 2. Mitotic defects associated with advanced age. (a-d)** Frame series of spinning-disk  
759 confocal movies of neonatal (HDF N) and elderly (HDF 87y) dividing cells expressing  
760 H2B-GFP- $\alpha$ -Tubulin-mCherry. **(a)** Neonatal cell division. **(b-d)** Elderly cell with chromosome  
761 alignment delay **(b)**, with anaphase lagging chromosome and micronucleus formation (\*) **(c)**, or  
762 with spindle mispositioning in relation to the growth surface and asynchronous adherence of the  
763 daughter cells **(d)** (Supplementary Video 1). Time, min:sec. Scale bar, 5  $\mu$ m. **(e)** Percentage of  
764 cells with mild and severe chromosome mis-segregation following treatment with Mps1  
765 inhibitor. **(f)** Percentage of cells with micronuclei. **(g)** Fraction of cells with spindle  
766 mispositioning. **(h)** Rate of cytokinesis failure. Values are mean  $\pm$  s.d. from at least two  
767 independent experiments, using two biological samples of similar age (except for progeria).  
768 Sample size (n) is indicated in each graph. \* $p \leq 0.05$ , \*\* $p \leq 0.01$ , \*\*\* $p \leq 0.001$  and \*\*\*\* $p \leq 0.0001$  in  
769 comparison to N/N by two-tailed  $\chi^2$  (e-h) and Mann-Whitney (j) statistical tests.

770

771



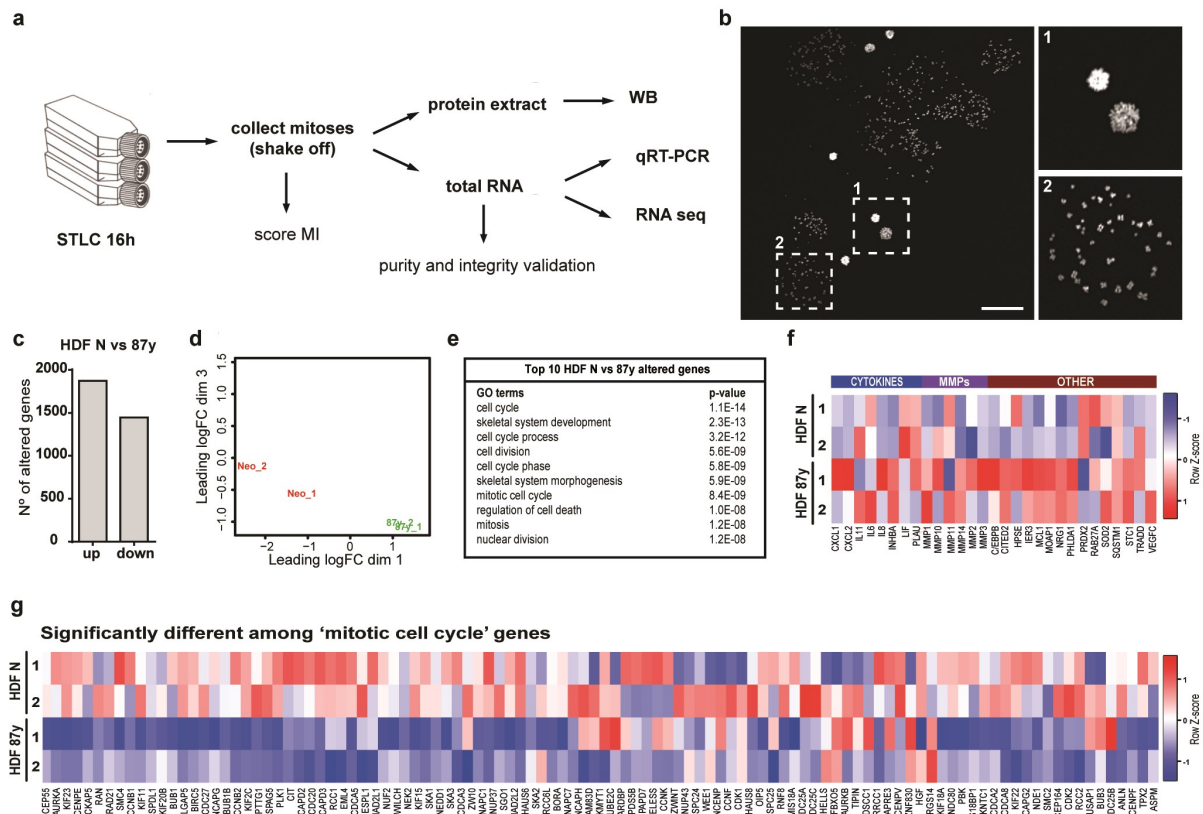

Macedo et al. Figure 3

772

773 **Figure 3. Elderly mitotic fibroblasts exhibit a downregulation of cell cycle genes. (a)**

774 Experimental layout. Fibroblast cultures from different age donors were treated with kinesin-5

775 inhibitor (STLC) to enrich for mitotic index (MI). Mitotic (detached) cells were collected and

776 inspected for MI > 95%. Protein extracts and total RNA were prepared for gene expression

777 analyses. **(b)** Representative image of MI > 95%. Scale bar, 100  $\mu$ m. **(c)** Number of altered genes

778 of HDF 87y, comparing to HDF N. **(d)** Multidimensional scaling plot of distances between gene

779 expression profiles based on sample RNA-sequencing. **(e)** Top ten altered GO terms organized

780 by p-values using the DAVID Functional Annotation tool. **(f)** Heatmap of SASP gene (cytokines,

781 metalloproteinases (MMPs) and other factors) expression in HDF N and HDF 87y. Genes are

782 represented in columns and biological replicates are represented in rows. In the Z-score column,

783 color intensities represent higher (red) to lower (blue) expression. **(g)** Heatmap of genes within

784 the 'mitotic cell cycle' GO term differentially expressed (fold change>1.6x; 5%FDR) between

785 HDF N and HDF 87y.

786

787

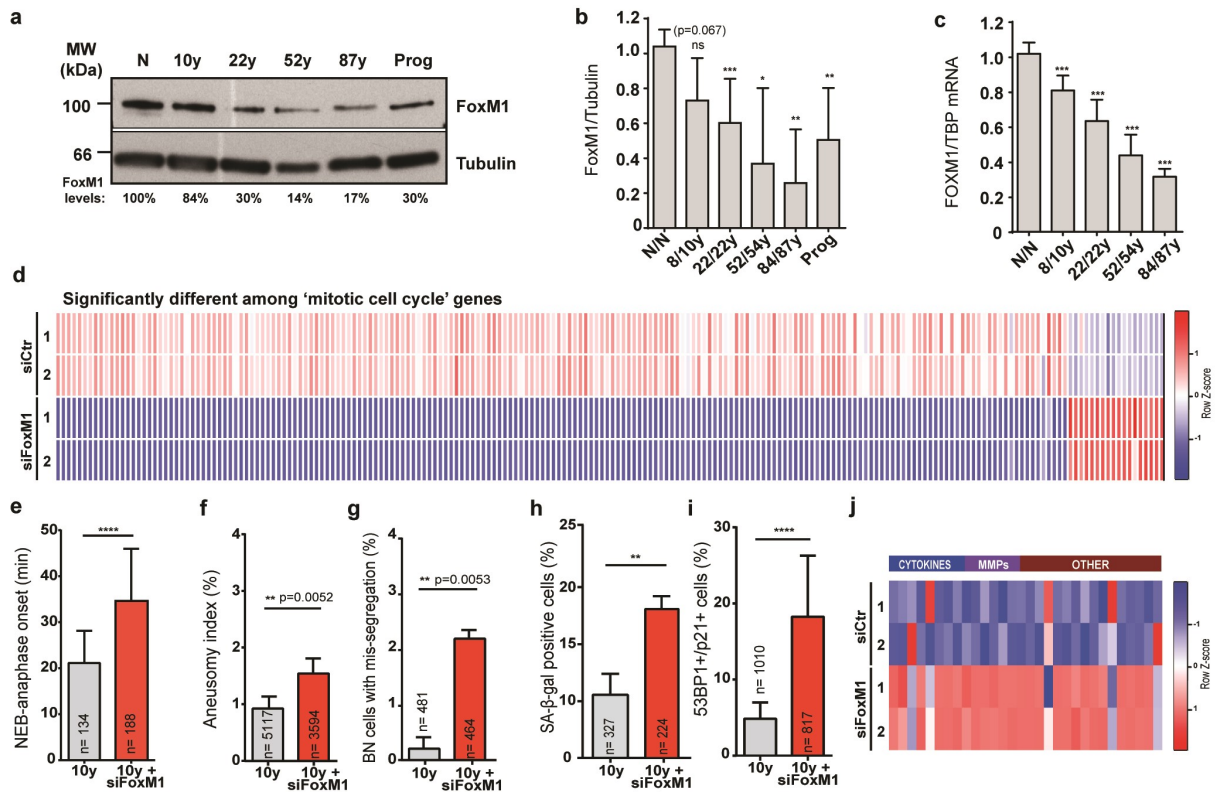

Macedo et al. Figure 4

788

789 **Figure 4. FoxM1 repression dictates cellular phenotypes associated with aging. (a,b)** FoxM1

790 protein levels in mitotic extracts of different age samples. FoxM1 levels were normalized to  $\alpha$ -

791 tubulin levels and to neonatal (N/N). **(c)** *FOXM1* transcript levels in mitotic total RNA from

792 different age samples, normalized to *TBP* transcript levels and compared to neonatal. **(d)**

793 Heatmap of genes within the 'mitotic cell cycle' GO term differentially expressed (fold

794 change > 1.6x; 5%FDR) by RNA-seq between control and FoxM1 siRNA-depleted 10 years-old

795 fibroblasts. Genes are represented in columns and sample replicates are represented in rows. In

796 the Z-score column, color intensities represent higher (red) to lower (blue) expression. **(e)**

797 Mitotic duration (NEB-anaphase onset) of control and FoxM1 siRNA-depleted fibroblasts. **(f-g)**

798 Aneusomy index in interphase cells **(f)** and in binucleated cells **(g)**. **(h-i)** Percentage of cells

799 staining positive for the senescence markers  $\beta$ -galactosidase **(h)** and 53BP1/p21 **(i)**. **(j)** Heatmap



800 of SASP genes differentially expressed between HDF 10y and 10y siFoxM1. Values are  
801 mean  $\pm$  s.d. of three independent experiments. Sample size (n) is indicated in each graph.  
802 \* $p \leq 0.05$ , \*\* $p \leq 0.01$ , \*\*\* $p \leq 0.001$  and \*\*\*\* $p \leq 0.0001$  by Mann-Whitney (b,c,e) and two-tailed  $\chi^2$   
803 (f, g, h, i) statistical tests.

804

805

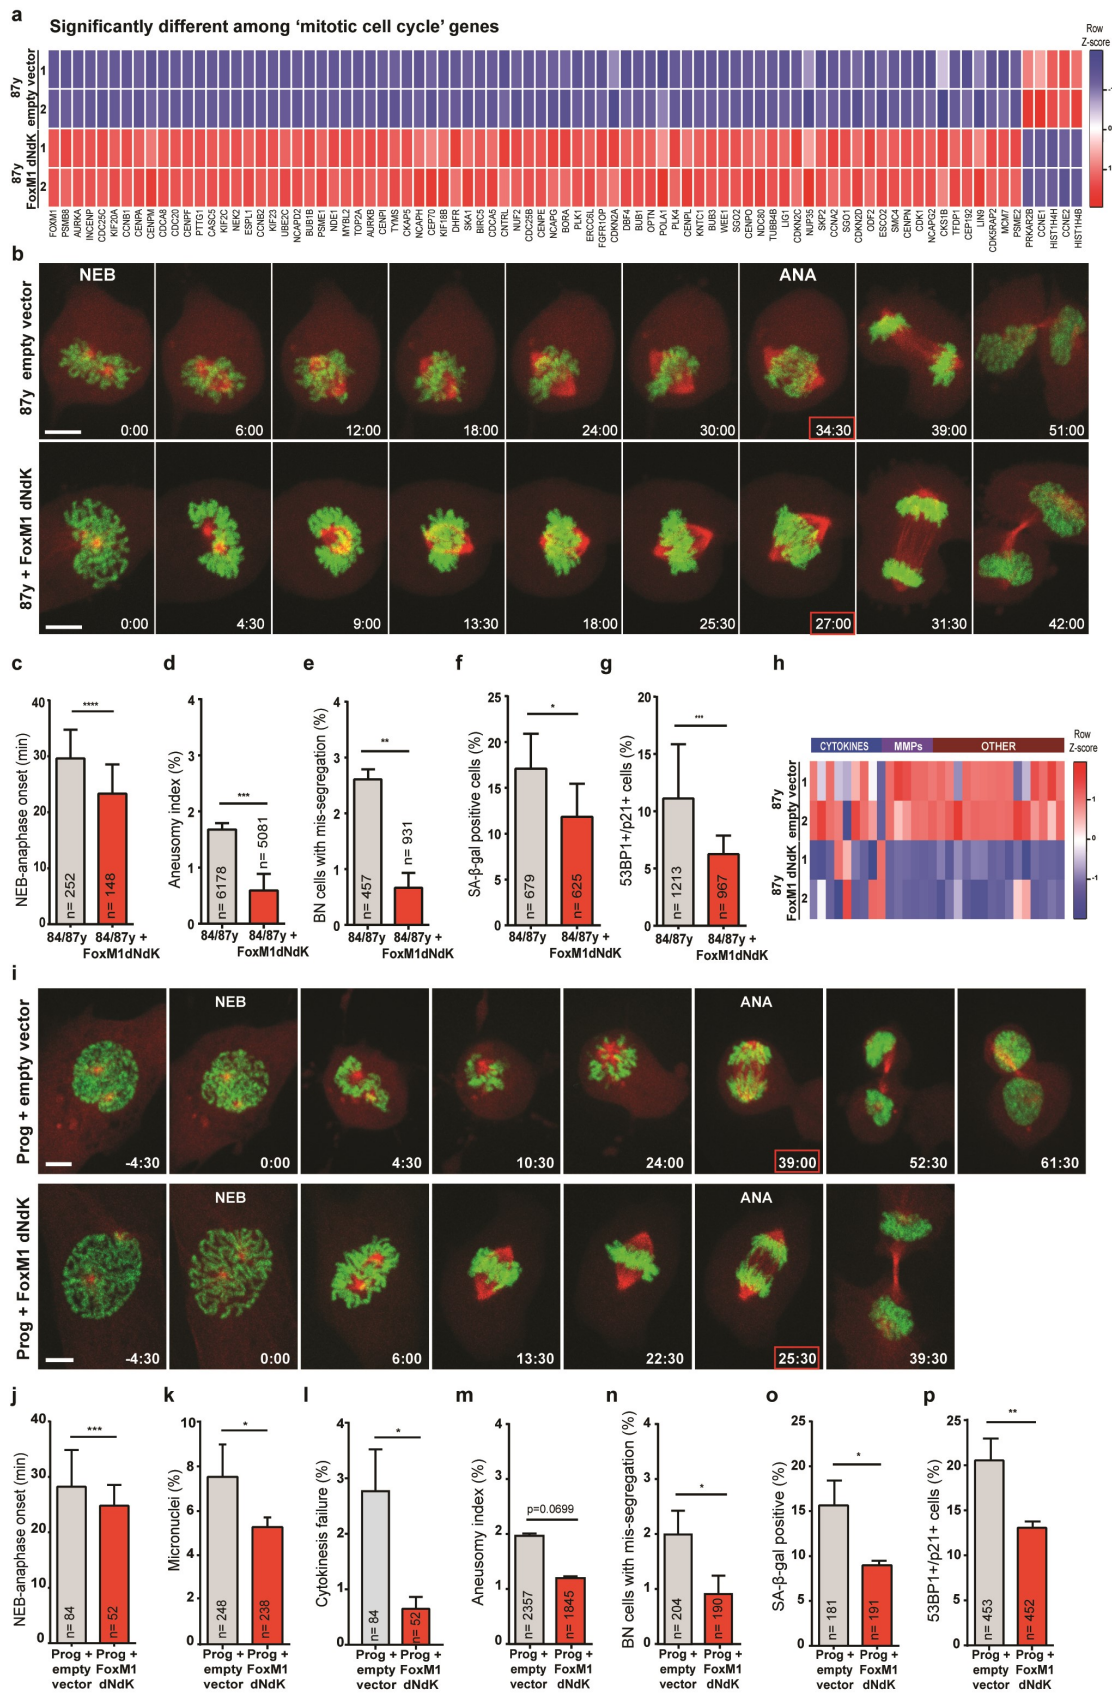

807 **Figure 5. Constitutively active FoxM1 ameliorates mitotic fitness and aging markers in**  
808 **elderly and HGPS cells. (a)** Heatmap of genes within the ‘mitotic cell cycle’ GO term  
809 differentially expressed (fold change>1.6x; 5%FDR) between mitotic elderly cells transduced  
810 with lentiviral empty vector or vector expressing FoxM1dNdK. In the Z-score column, color  
811 intensities represent higher (red) to lower (blue) expression. **(b)** Movie frames of elderly dividing  
812 cells expressing H2B-GFP- $\alpha$ -Tubulin-mCherry (upper panel) and H2B-GFP- $\alpha$ -Tubulin-mCherry  
813 + FoxM1dNdK (lower panel) (Supplementary Video 2). Time, min:sec. Scale bar, 5  $\mu$ m. **(c)**  
814 Mitotic duration (NEB to anaphase onset) in elderly fibroblasts infected with control and  
815 FoxM1dNdK lentiviruses. **(d-e)** Aneusomy index in interphase **(d)** and binucleated cells **(e)**. **(f-g)**  
816 Percentage of cells staining positive for the senescence markers  $\beta$ -galactosidase **(f)** and  
817 53BP1/p21 **(g)**. **(h)** Heatmap of SASP genes differentially expressed between HDF 87y and 87y  
818 FoxM1dNdK. **(i)** Movie frames of mitotic HGPS fibroblasts expressing H2B-GFP- $\alpha$ -  
819 Tubulin-mCherry (upper panel) and H2B-GFP- $\alpha$ -Tubulin-mCherry+FoxM1dNdK (lower panel)  
820 (Supplementary Video 3). Time min:sec. Scale bar, 5  $\mu$ m. **(j)** Mitotic duration of HGPS  
821 fibroblasts transduced with empty and FoxM1dNdK lentiviruses. **(k)** Percentage of cells with  
822 micronucleus. **(l)** Percentage of cells failing cytokinesis. **(m)** Aneusomy index in interphase  
823 nuclei and **(n)** mis-segregation events in binucleated cells estimated from FISH analysis of 3  
824 chromosome pairs. **(o,p)** Percentage of cells staining positive for the senescence markers **(o)**  $\beta$ -  
825 galactosidase and **(p)** 53BP1/p21. Values are mean  $\pm$  s.d. of three independent experiments.  
826 Sample size (n) is indicated in each graph. \* $p \leq 0.05$ , \*\* $p \leq 0.01$ , \*\*\* $p \leq 0.001$  and \*\*\*\* $p \leq 0.0001$   
827 by Mann-Whitney (c,j) and two-tailed  $\chi^2$  (d-g; k-p) statistical tests.

828

829

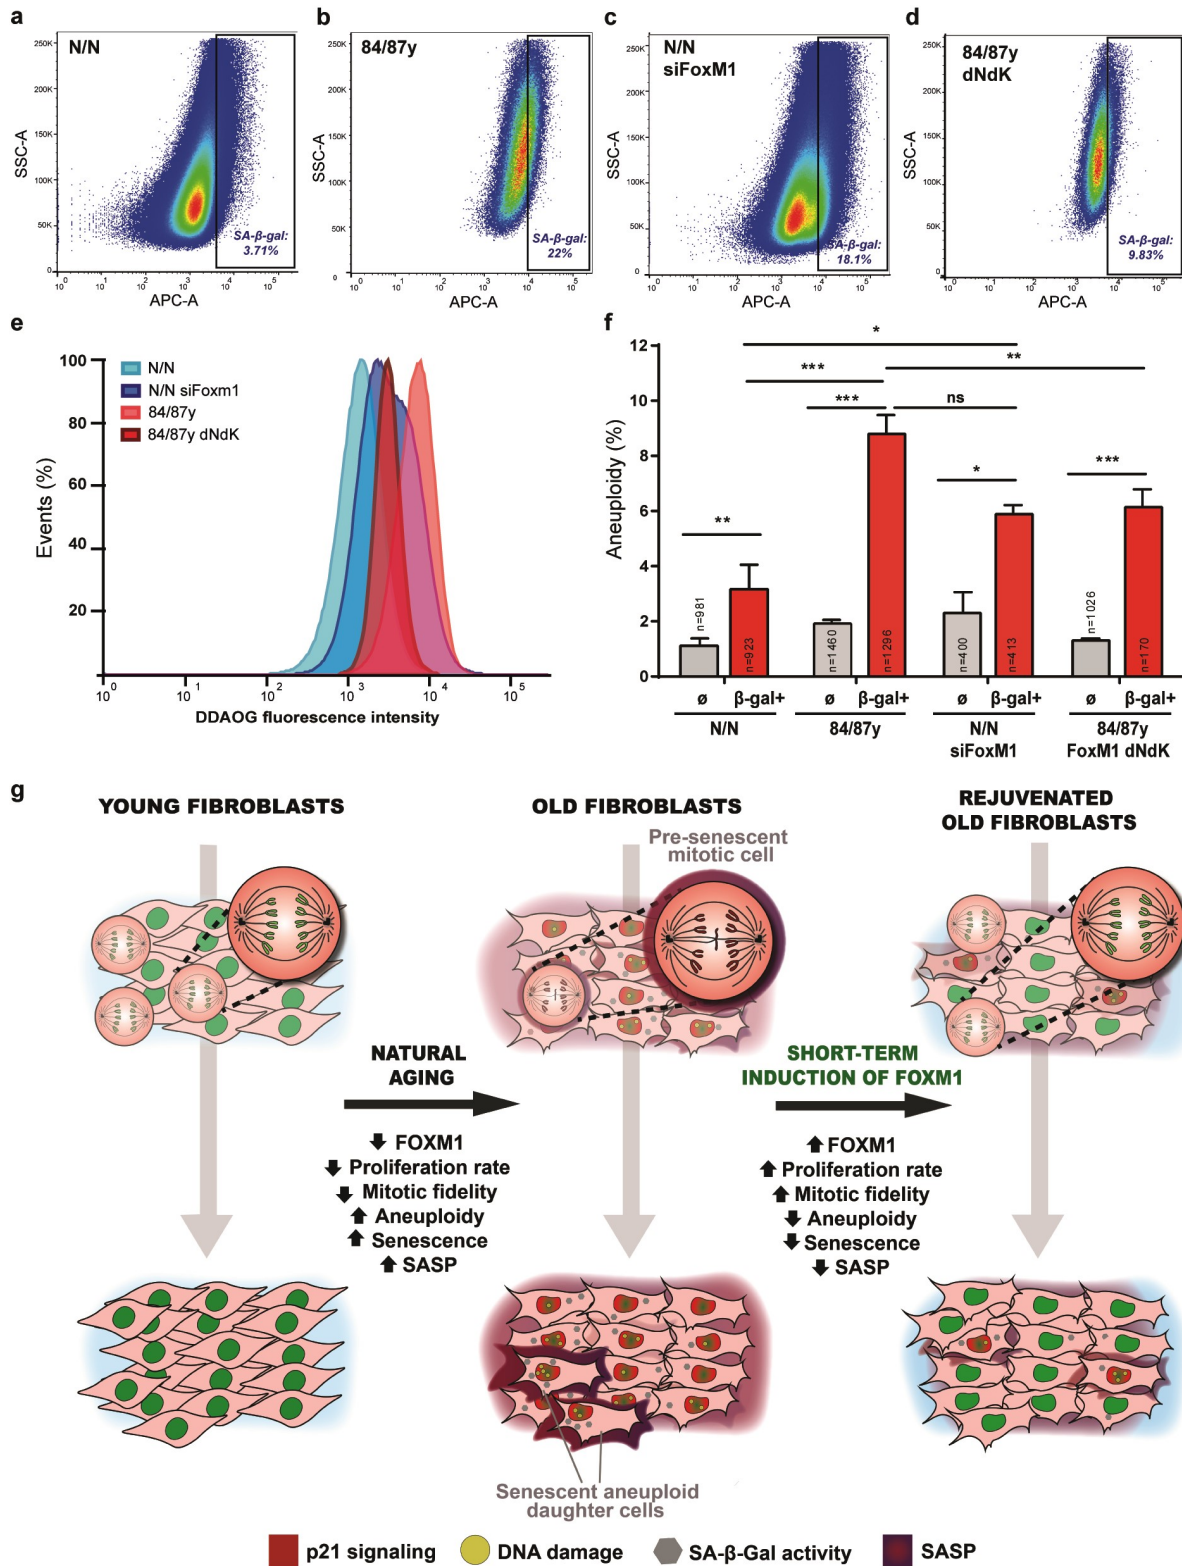

Macedo et al. Figure 6

831 **Figure. 6. FoxM1 governs aneuploidization-driven cellular senescence in elderly cells. (a-d)**  
832 FACS sorting of senescent cells from neonatal **(a)**, elderly **(b)**, FoxM1 siRNA-depleted neonatal  
833 **(c)** and 84y/87y with FoxM1dNdK **(d)** cell populations with high  $\beta$ -galactosidase activity. The  
834 gates were defined accordingly to the respective auto-fluorescent control. **(e)** Relative intensity  
835 levels of the fluorogenic substrate DDAOG in the sorted cell populations. **(f)** Aneuploidy index  
836 in FACS-sorted  $\beta$ -gal-positive fibroblast subpopulations ( $\beta$ -gal<sup>+</sup>) vs. unsorted populations ( $\emptyset$ ) as  
837 determined by FISH analysis for 3 chromosome pairs. Values are mean  $\pm$  s.d. of two independent  
838 experiments. Sample size (n) is indicated in each graph. ns:  $p > 0.05$ , \* $p \leq 0.05$ , \*\* $p \leq 0.01$ ,  
839 \*\*\* $p \leq 0.001$  and \*\*\*\* $p \leq 0.0001$  by two-tailed  $\chi^2$  statistical test. **(g)** Model summarizing the  
840 molecular basis of age-associated mitotic decline and accumulation of senescent cells. FoxM1  
841 repression in pre-senescent dividing cells leads to aneuploidy, which accounts for the transition  
842 into full senescence. FoxM1 induction in old cells restores mitotic fitness and erases aging  
843 markers.  
844



845 **Supplementary information:**

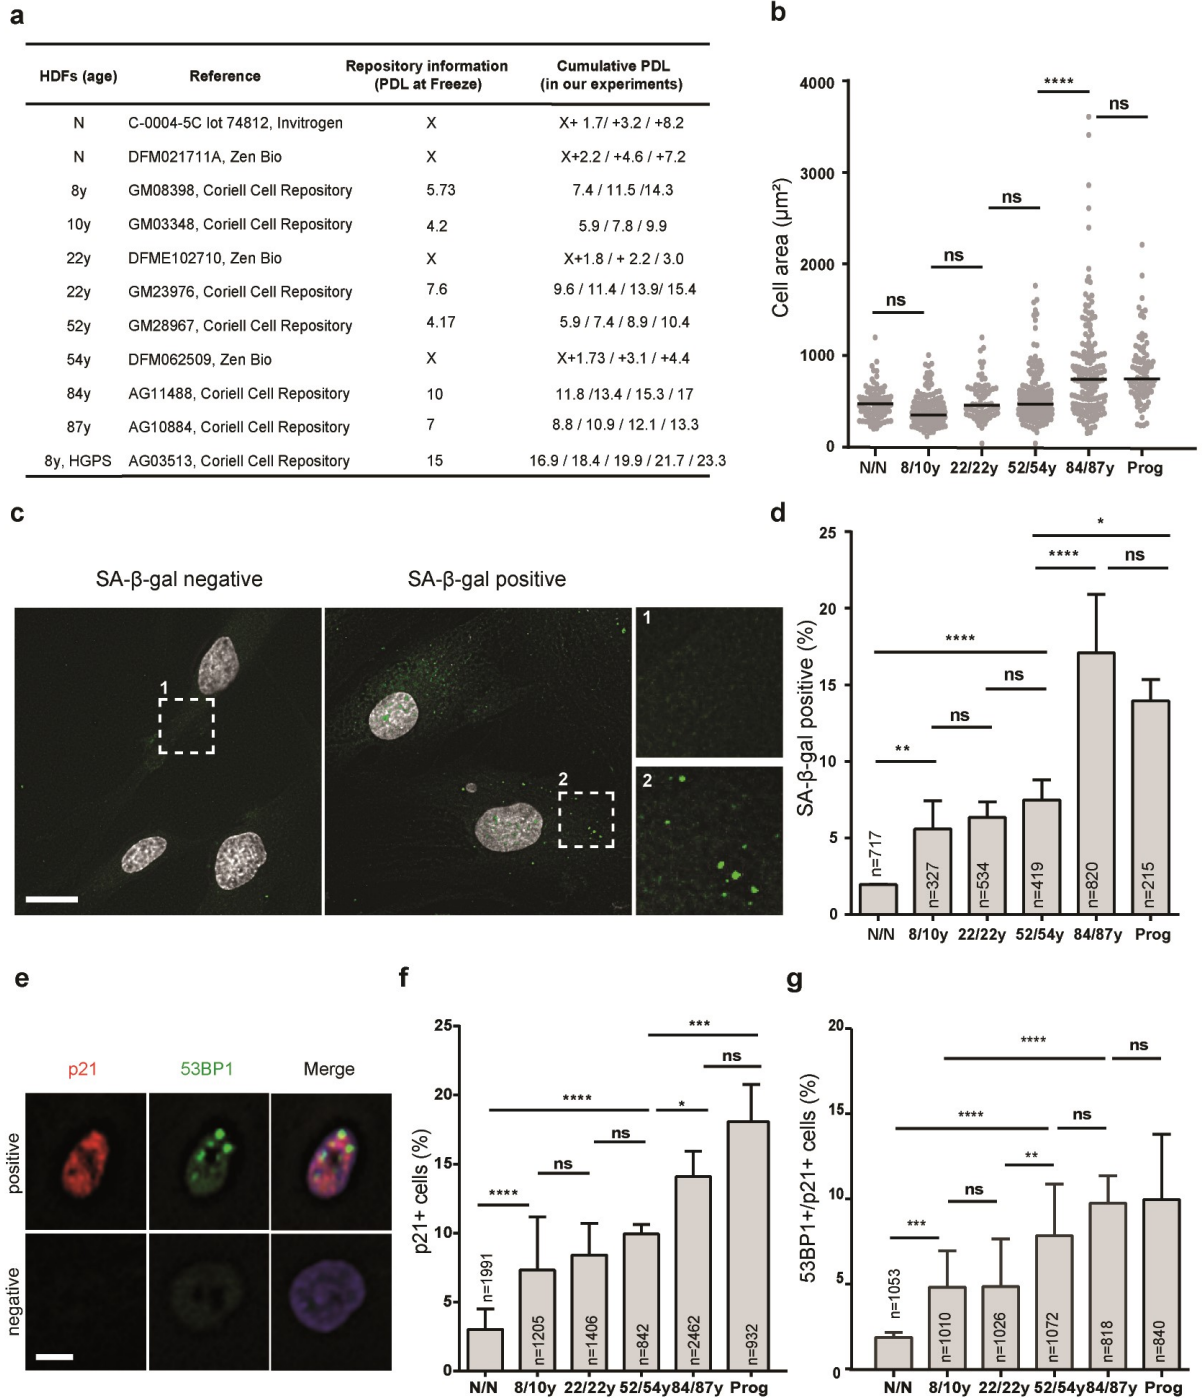

847 **Supplementary Figure 1. Senescence markers in human dermal fibroblasts from different**  
848 **age donors. (a)** Fibroblasts from skin biopsies of Caucasian males with different ages used in  
849 this study. All donors were reported as "healthy", except the 8 years old donor with the  
850 Hutchison-Gilford Progeria Syndrome. **(b)** Cellular area. Scatter plots show mean of  $n > 50$  cells.  
851 **(c)** Representative images of senescence-associated  $\beta$ -galactosidase (SA- $\beta$ -gal) negative and  
852 positive cells. Scale bar, 20  $\mu\text{m}$ . **(d)** Percentage of cells staining positive for senescence-  
853 associated  $\beta$ -galactosidase assay. **(e)** Representative images of cell cycle-arrested cells (p21  
854 positive) and DNA damage ( $\geq 1$  53BP1 foci). Scale bar, 10  $\mu\text{m}$ . **(f)** Percentage of cells staining  
855 positive for Cdkn1a/p21 cell cycle inhibitor. **(g)** Percentage of Cdkn1a/p21 positive cells with  
856 53BP1 foci. In all graphs, bars represent mean  $\pm$  s.d. values from three independent experiments  
857 using two biological samples of similar age (except for progeria). Sample size (n) is indicated in  
858 each graph. ns:  $p > 0.05$ , \* $p \leq 0.05$ , \*\* $p \leq 0.01$ , \*\*\* $p \leq 0.001$  and \*\*\*\* $p \leq 0.0001$  by two-tailed  $\chi^2$  (d, f,  
859 g) and Mann-Whitney (b) statistical tests.

860

861

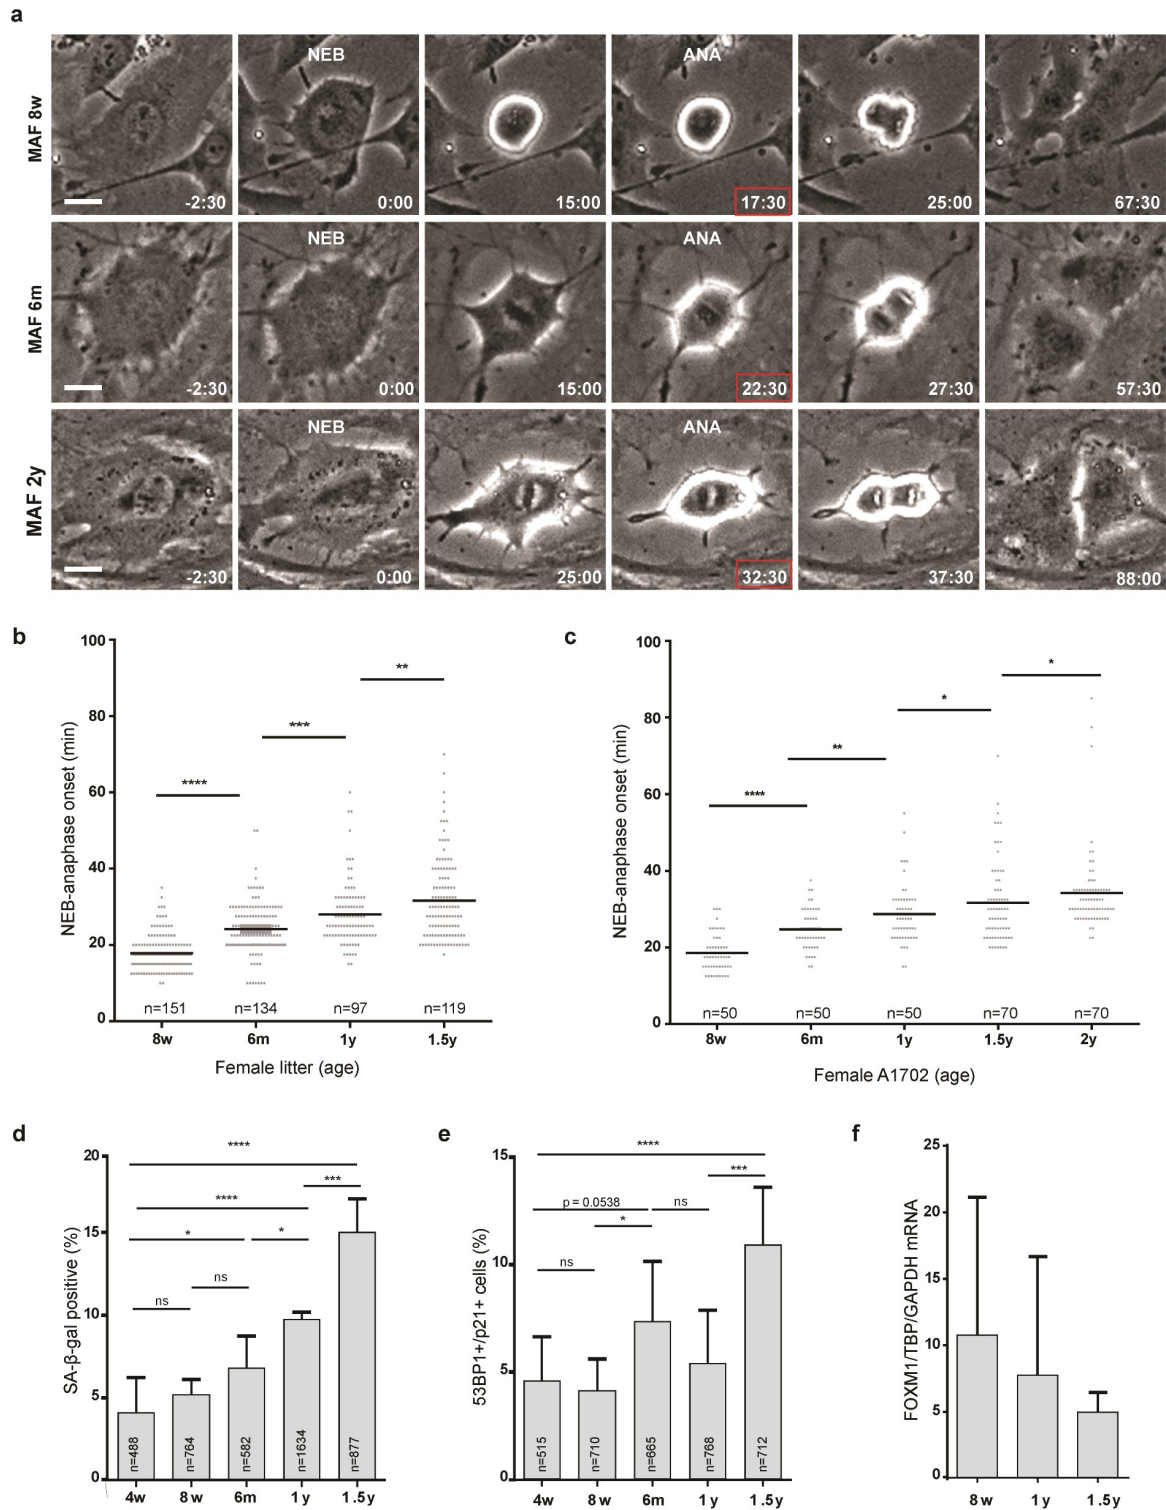

Macedo et al. Supplementary Figure 2



863 **Supplementary Figure 2. Aging-associated mitotic delay in mouse fibroblasts. (a)** Movie  
864 frames of mitosis in MAFs collected at different age time-points as indicated. NEB, nuclear  
865 envelope breakdown. ANA, anaphase onset. Time min:sec. Scale bar, 20  $\mu$ m. **(b)** Mitotic  
866 duration (NEB to anaphase onset) of individual MAFs collected at different age time-points from  
867  $\geq 3$  sv/129 sister females. **(c)** Mitotic duration of individual MAFs collected at different age time-  
868 points from one randomly chosen single female (A1702). **(d)** Percentage of cells staining positive  
869 for senescence-associated  $\beta$ -galactosidase assay. **(e)** Percentage of Cdkn1a/p21 positive cells  
870 with 53BP1 foci. **(f)** *FOXMI* transcript levels in mitotic total RNA from different age samples.  
871 Values are mean  $\pm$  s.d. normalized to *TBP* and *GAPDH* transcript levels. Values are shown as  
872 mean, and sample size (n) is indicated in each graph. ns:  $p > 0.05$ , \* $p \leq 0.05$ , \*\* $p \leq 0.01$ ,  
873 \*\*\* $p \leq 0.001$  and \*\*\*\* $p \leq 0.0001$  by Mann-Whitney statistical test.

874

875

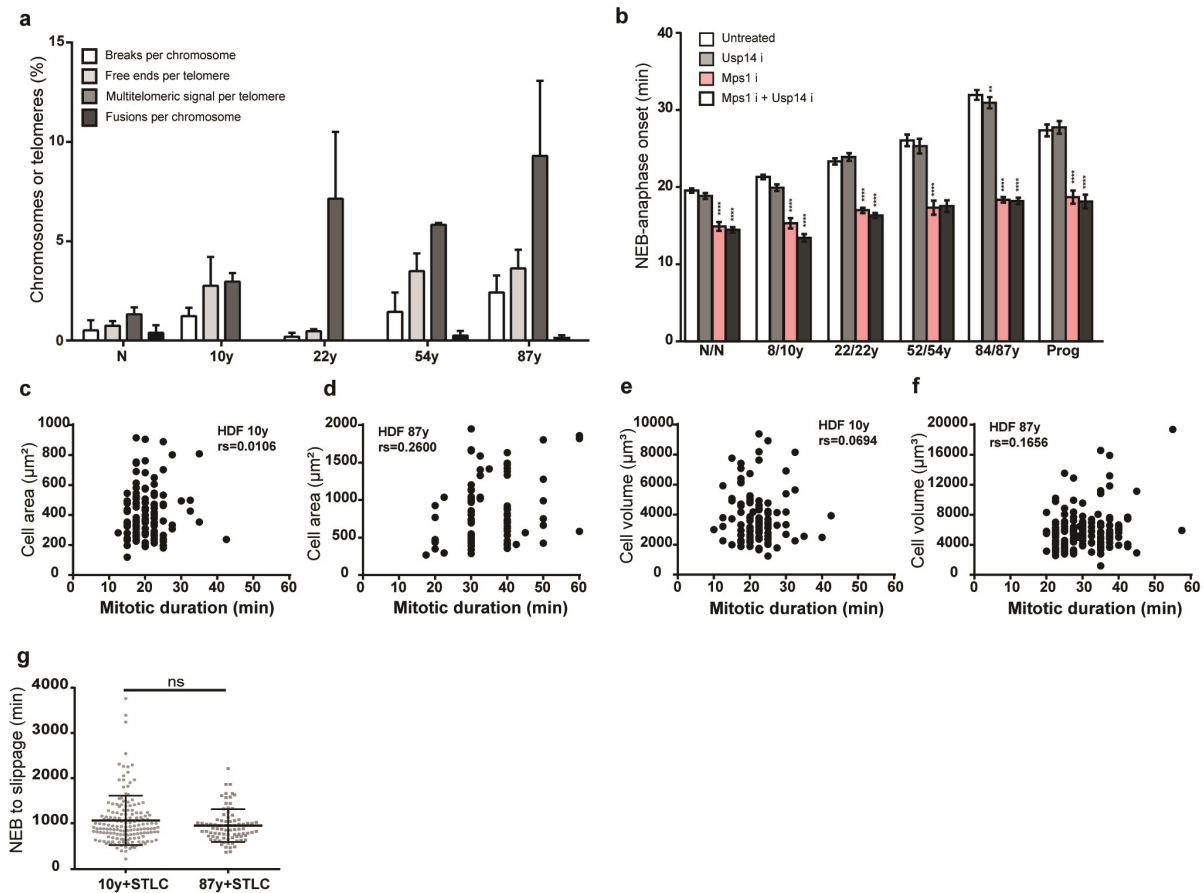

### Macedo et al. Supplementary Figure 3

876

877 **Supplementary Figure 3. Effects of SAC activity, proteotoxic stress and cell size in mitotic**

878 **duration. (a)** Metaphase spreads of colcemid-treated cells of different age donors were

879 quantified for chromosome fusions, chromosome breaks, telomere free ends and multitelomeric

880 signals (MTS; marker of telomere replication defect). At least 900 chromosomes or 3,500

881 telomeres were quantified in two independent experiments. Values are shown as mean  $\pm$  s.e.m.

882 Age-dependent significant differences in chromosome aberrations were tested by one-way

883 ANOVA for linear trend and multiple comparisons. Chromosome fusions, chromosome breaks

884 and telomere free ends, not significant; MTS shown a linear trend with  $p$ -value  $\leq 0.05$ . **(b)** Mitotic

885 duration of human fibroblasts from different age donors cultured under standard conditions

886 (white bars) and following treatment with Usp14 inhibitor (light gray bars), Mps1 inhibitor

887 (colored bars) and Mps1+Usp14 inhibitors (dark gray bars). **(c-f)** Spearman's correlation  
888 coefficients ( $r_s$ ) between mitotic duration and **(c-d)** cell area or **(e-f)** cell volume. **(g)** Elapsed  
889 time from nuclear envelope breakdown (NEB) to cell's adherence into the surface (slippage) in  
890 fibroblasts treated with kinesin-5 inhibitor (STLC). Values are mean  $\pm$  s.d. of  $n>50$  (b) and  $n>80$   
891 (c-g) scored cells from three independent experiments. ns:  $p>0.05$ , \*\* $p\leq 0.01$ , \*\*\* $p\leq 0.001$  by  
892 Mann-Whitney statistical test (b-g).

893

894

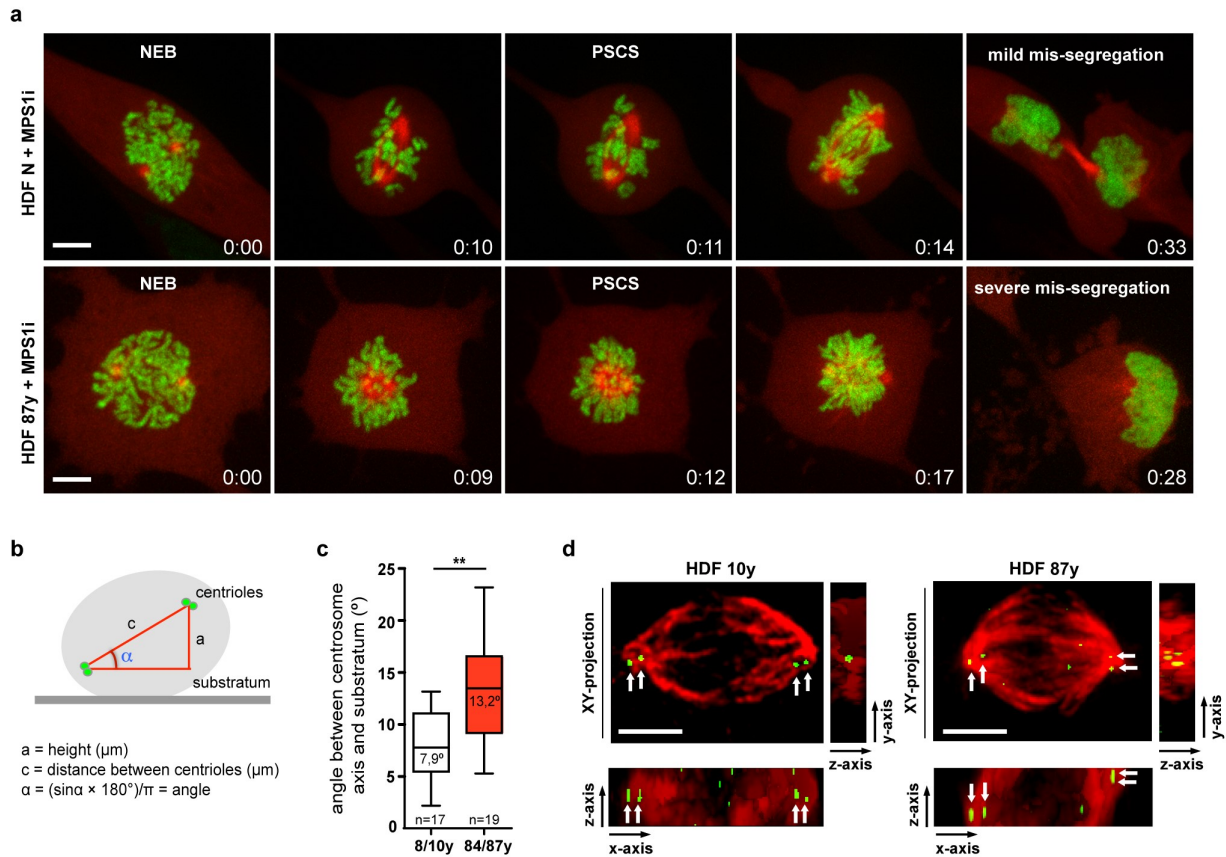

Macedo et al. Supplementary Figure 4

895  
 896 **Supplementary Figure 4. Quantitative analysis of aging-associated mitotic defects.** (a)  
 897 Chromosome alignment delay. Representative movie frames of neonatal and elderly cells  
 898 inhibited for Mps1 to prematurely exit mitosis in the presence of misaligned chromosomes.  
 899 Examples of mild chromosome mis-segregation (bipolar anaphase without cytokinesis failure)  
 900 (upper panel) and severe chromosome mis-segregation (failure in anaphase movement and  
 901 cytokinesis) (lower panel) are shown. NEB, nuclear envelope breakdown. PSCS, precocious  
 902 sister chromatid separation. Time min:sec. (b-d) Spindle mispositioning. (b) Scheme depicting  
 903 the calculation of the spindle angle in relation to the growth surface. (c) Box-and-whisker plot  
 904 with median, IQR and minimum and maximum values, illustrating the range of spindle angle  
 905 values from young and elderly metaphase cells. n indicates sample size.  $**p \leq 0.01$  by

906 Mann-Whitney test. **(d)** Orthogonal projections (in xy, xz and yz axes) of the 3D distribution of  
907 the spindle ( $\alpha$ -tubulin, red) and centrioles (green) in young and elderly fibroblasts. Scale bar,  
908 5  $\mu\text{m}$  (a,d).

909

910

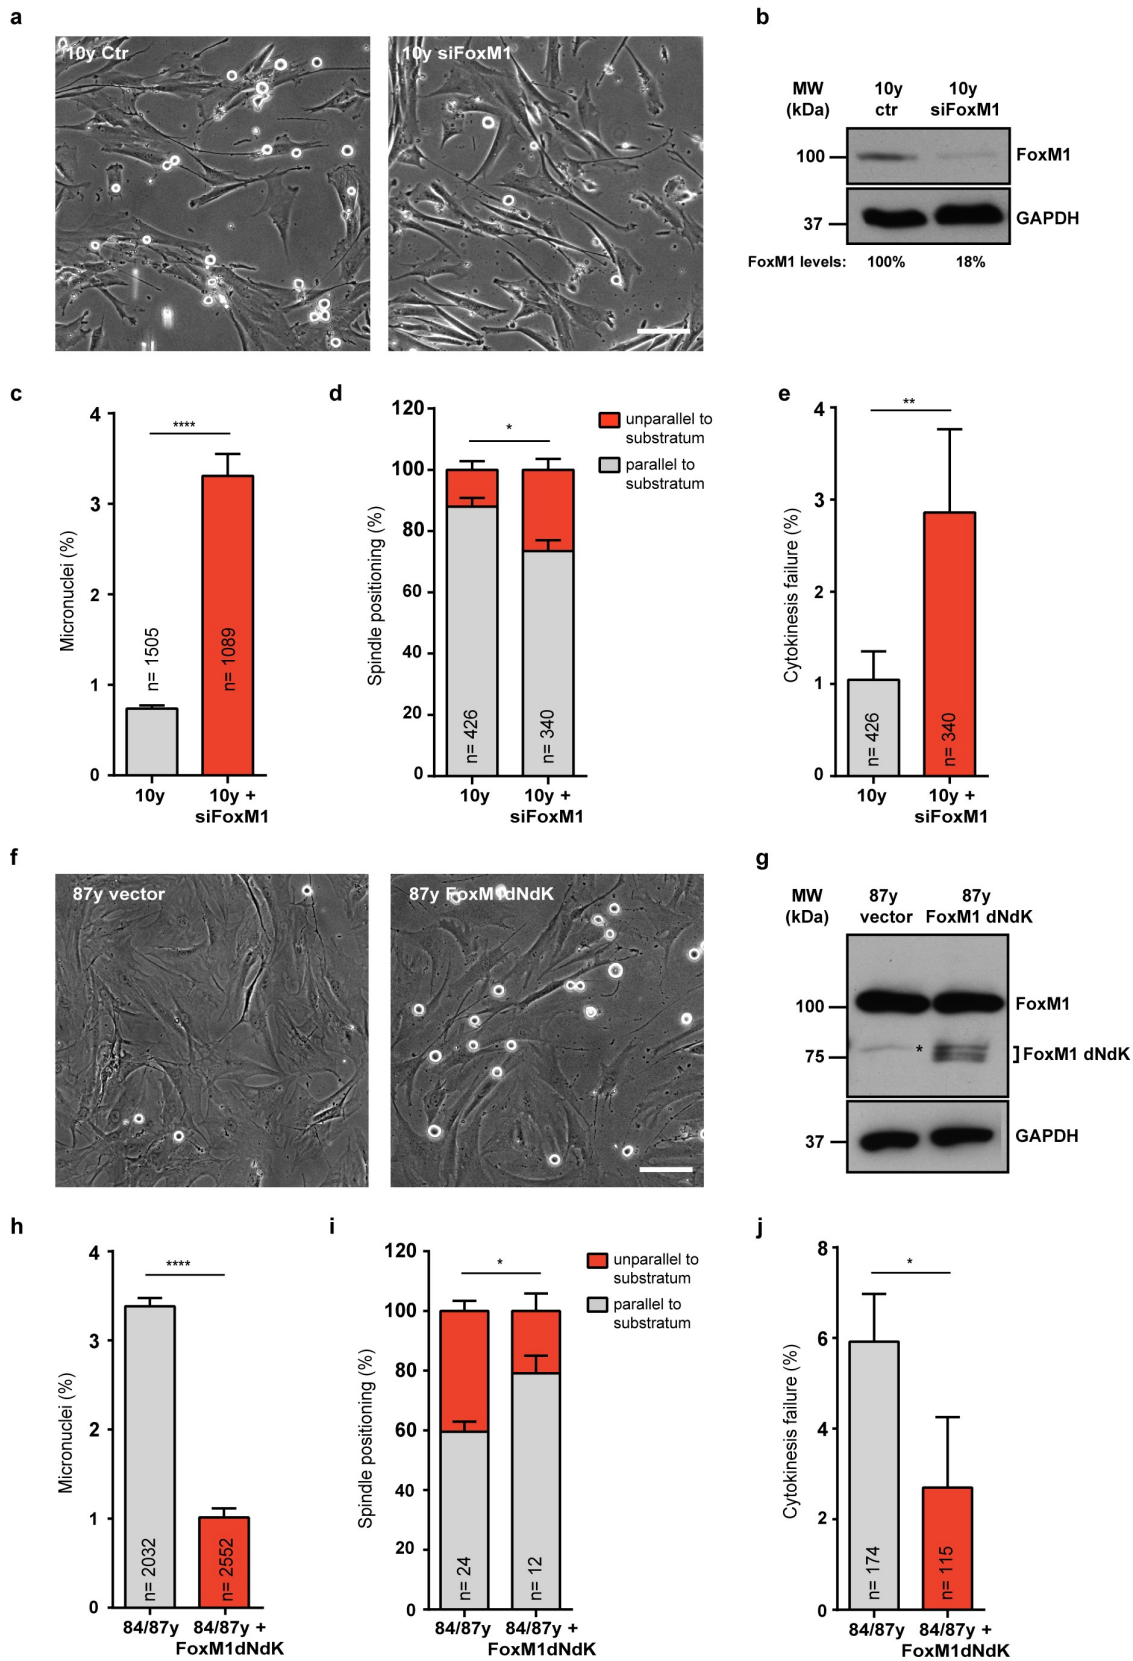

912 **Supplementary Figure 5. Modulation of FoxM1 levels affects mitotic fidelity. (a-e)** FoxM1  
913 repression in young cells. **(a)** FoxM1 RNAi depletion (siFoxM1) decreases mitotic index. **(b)**  
914 Western blot validation of FoxM1 decreased levels following RNAi.  $\alpha$ -tubulin was used as  
915 loading control. **(c)** Percentage of cells with micronuclei. **(d)** Percentage of mitotic cells  
916 exhibiting unparallelled spindle to the substratum (in red). **(e)** Percentage of mitotic cells failing  
917 cytokinesis. **(f-j)** Expression of constitutively active FoxM1 (FoxM1dNdK) in elderly cells. **(f)**  
918 FoxM1dNdK expression increases mitotic index. **(g)** Western blot validation of FoxM1dNdK  
919 expression. Asterisk indicates unspecific band in untransduced 87y cells. GAPDH was used as  
920 loading control. **(h)** Percentage of cells with micronuclei. **(i)** Percentage of mitotic cells  
921 exhibiting unparallelled spindle to the substratum (in red). **(j)** Percentage of mitotic cells failing  
922 cytokinesis. Values are mean  $\pm$  s.d. from three independent experiments. Sample size (n) is  
923 indicated in each graph. \* $p \leq 0.05$ , \*\* $p \leq 0.01$  and \*\*\*\* $p \leq 0.0001$  by two tailed  $\chi^2$  statistical test.

924

925



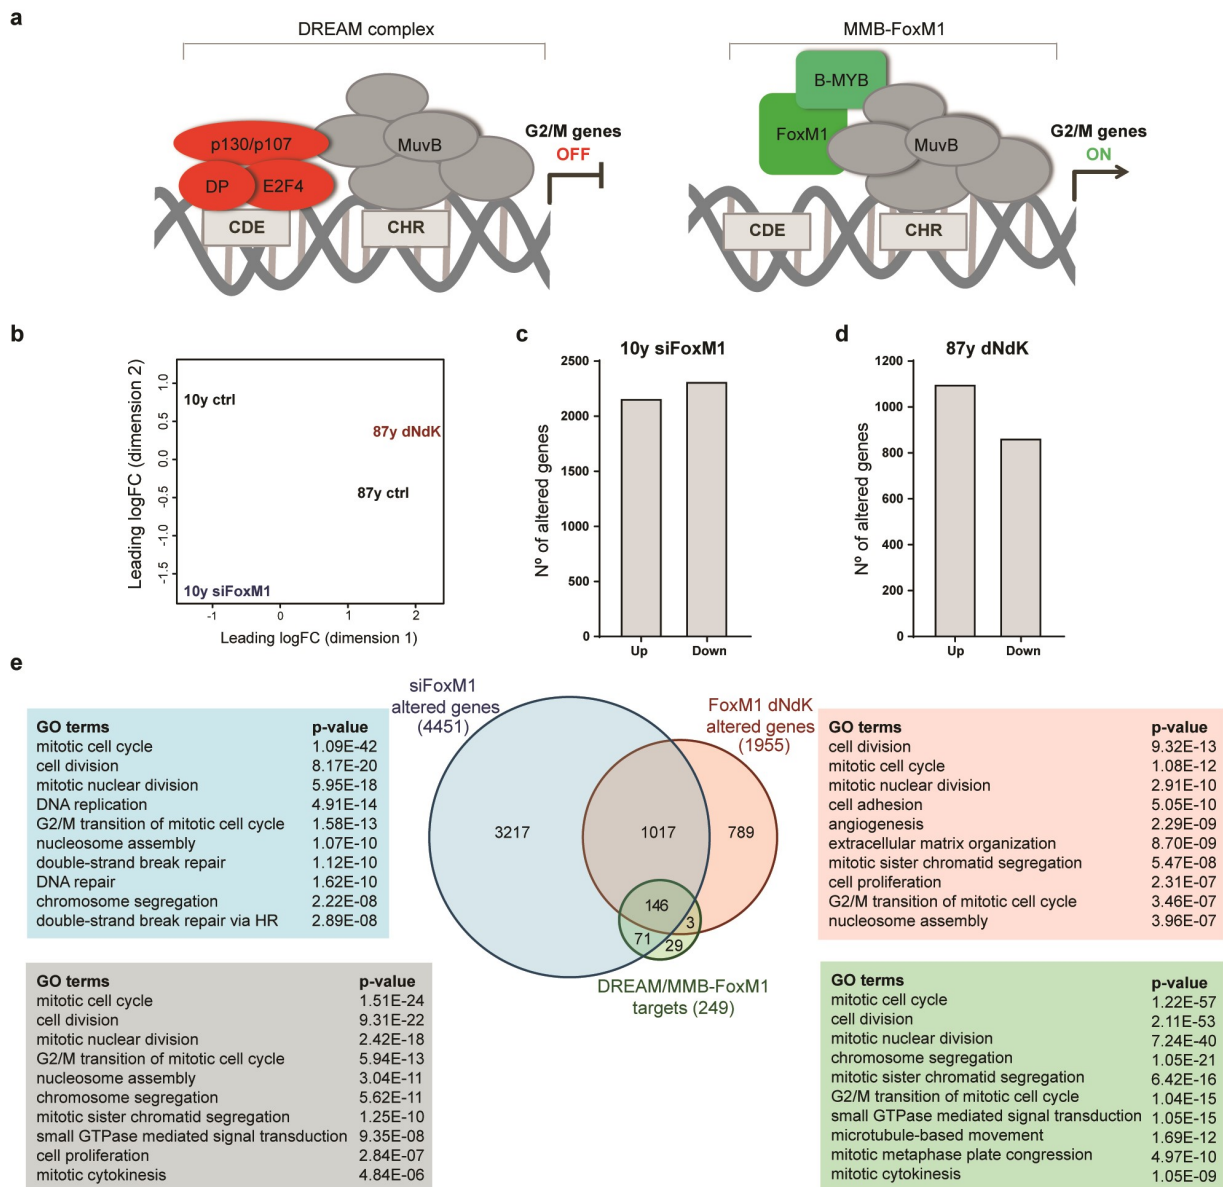

## Macedo et al. Supplementary Figure 6

926

927 **Supplementary Figure 6. Meta-analysis of differentially expressed genes upon modulation**

928 **of FoxM1 levels. (a) Regulation of G2/M cell cycle genes through sequential binding of**

929 **DREAM and MMB-FoxM1 to CHR promoter elements, as described in <sup>38</sup>. (b) Multidimensional**

930 **scaling plot of distances between gene expression profiles based on sample RNA-sequencing. (c)**

931 **Number of altered genes upon FoxM1 RNAi in 10y cells. (d) Number of altered genes upon**

932 **lentiviral transduction of 87y cells with FoxM1dNdK. Genes are listed in Supplementary Table**



933 1. **(e)** Venn diagram displaying the overlaps between siFoxM1 altered genes, FoxM1dNdK  
934 altered genes and targets of both DREAM and MMB-FoxM1 complexes <sup>43</sup> (Supplementary  
935 Table 2). The respective top ten GO terms are organized by *p*-values using the DAVID  
936 Functional Annotation tool.

937

938 **Supplementary Table 1.** RNA-sequencing data sets. Table includes comparative gene  
939 expression analysis.

940

941 **Supplementary Table 2.** Venn Diagram data sets. Overlap between FoxM1 RNAi altered genes,  
942 FoxM1dNdK altered genes, and DREAM/MMB-FoxM1 targets. Table includes all the  
943 overlapping clusters represented in the Venn diagram. Genes are listed accordingly to Ensembl  
944 ID.

945

946 **Supplementary Table 3.** Primers used in qPCR and cloning.

947

948 **Supplementary Video 1.** From left to right. Mitotic progression of a neonatal fibroblast (HDF  
949 N) co-expressing H2B-GFP (green) and  $\alpha$ -tubulin-mCherry (red). Chromosome congression  
950 delay in a dividing elderly fibroblast (HDF 87y) co-expressing H2B-GFP (green) and  $\alpha$ -tubulin-  
951 mCherry (red). Chromosome anaphase lagging and micronucleus formation in a dividing elderly  
952 fibroblast (HDF 87y) co-expressing H2B-GFP (green) and  $\alpha$ -tubulin-mCherry (red).  
953 Unparalleled mitotic spindle positioning in relation to the growth surface and asynchronous  
954 adherence of the daughter cells in a dividing elderly fibroblast (HDF 87y) co-expressing H2B-  
955 GFP (green) and  $\alpha$ -tubulin-mCherry (red). Time-lapse images were acquired on a spinning-disk

956 confocal microscope using 90 s intervals. Time min:sec. Frame series from this movie were used  
957 in Fig. 2a-d.

958

959 **Supplementary Video 2.** From left to right. Mitotic delay from nuclear envelope breakdown  
960 (NEB) to anaphase onset (ANA) in an elderly fibroblast (HDF 87y) co-expressing H2B-GFP  
961 (green) and  $\alpha$ -tubulin-mCherry (red). Mitotic efficiency rescue following expression of  
962 FoxM1dNdK in an elderly fibroblast (HDF 87y) co-expressing H2B-GFP (green),  $\alpha$ -tubulin-  
963 mCherry (red). Time-lapse images were acquired on a spinning-disk confocal microscope using  
964 90 s intervals. Time min:sec. Frame series from this movie were used in Fig. 5b.

965

966 **Supplementary Video 3.** From left to right. Chromosome alignment delay and mitotic spindle  
967 mispositioning in a HGPS (Progeria) fibroblast co-expressing H2B-GFP (green) and  $\alpha$ -tubulin-  
968 mCherry (red). Mitotic efficiency rescue following FoxM1dNdK expression in a HGPS  
969 (Progeria) fibroblast co-expressing H2B-GFP (green) and  $\alpha$ -tubulin-mCherry (red). Time-lapse  
970 images were acquired on a spinning-disk confocal microscope using 90 s intervals. Time  
971 min:sec. Frame series from this movie were used in Fig. 5i.
